# Supplementary material for: Rapid hydration and weakening of anhydrite under stress: implications for natural hydration in the Earth's crust and mantle
Source: Copernicus journal article supplement (doi:10.5194/se-14-985-2023), 2023-09-01
Supplement: Supplementary file 1 [file Mechanical Data.xlsx]

## Sheet: V
	Differential Stress	Strain		449		0.538148
V	0.686	0				0.554132
AA-5, 50 Mpa, dry, strain rate 1*10^-6s^-1	0.7	0				0.0159838
dry	0.699	0
00:23:01	0.685	0
	0.686	0
	0.672	0
	0.674	0
	0.673	0
	0.674	0
	0.674	0
	0.688	0
	0.687	0
	0.678	0
	0.679	0.00483871
	0.68	0.00483871
	0.681	0.00483871
	0.681	0.00483871
	0.681	0.00483871
	0.68	0.00483871
	0.692	0.00483871
	0.692	0.00483871
	0.679	0.00483871
	0.678	0.00483871
	0.692	0.00483871
	0.692	0.00483871
	0.706	0.00483871
	0.705	0.00483871
	0.718	0.00483871
	0.731	0.00483871
	0.73	0.00483871
	0.731	0.00483871
	0.745	0.00483871
	0.745	0.00483871
	0.758	0.00483871
	0.756	0.00483871
	0.783	0.00483871
	0.797	0.00483871
	0.81	0.00483871
	0.81	0.00483871
	0.824	0.00483871
	0.836	0.00483871
	0.862	0.00483871
	0.876	0.00483871
	0.889	0.00483871
	0.916	0.00483871
	0.929	0.00483871
	0.943	0.00483871
	0.955	0.00483871
	0.983	0.00483871
	1.008	0.00483871
	1.048	0.00483871
	1.077	0.00483871
	1.104	0.00483871
	1.131	0.00483871
	1.157	0.00483871
	1.224	0.00483871
	1.238	0.00483871
	1.291	0.00483871
	1.318	0.00483871
	1.372	0.00483871
	1.438	0.00483871
	1.477	0.00483871
	1.557	0.00483871
	1.611	0.00483871
	1.625	0.00483871
	1.625	0.00483871
	1.638	0.00483871
	1.625	0.00483871
	1.625	0.00483871
	1.626	0.00483871
	1.625	0.00483871
	1.624	0.00483871
	1.625	0.00483871
	1.613	0.00483871
	1.613	0.00483871
	1.598	0.00483871
	1.613	0.00483871
	1.613	0.00483871
	1.613	0.00483871
	1.612	0.00483871
	1.612	0.00483871
	1.613	0.00483871
	1.612	0.00483871
	1.598	0.00483871
	1.612	0.00483871
	1.613	0.00483871
	1.598	0.00483871
	1.612	0.00483871
	1.612	0.00483871
	1.612	0.00483871
	1.613	0.00483871
	1.613	0.00483871
	1.599	0.00483871
	1.603	0.00483871
	1.605	0.00483871
	1.604	0.00483871
	1.619	0.00483871
	1.618	0.00483871
	1.632	0.00483871
	1.631	0.00483871
	1.631	0.00483871
	1.645	0.00483871
	1.658	0.00483871
	1.67	0.00483871
	1.671	0.00483871
	1.698	0.00483871
	1.723	0.00483871
	1.75	0.00483871
	1.75	0.00483871
	1.79	0.00483871
	1.816	0.00483871
	1.857	0.00483871
	1.868	0.00483871
	1.909	0.00483871
	1.961	0.00483871
	1.988	0.00483871
	2.041	0.00483871
	2.095	0.00483871
	2.135	0.00483871
	2.188	0.00483871
	2.268	0.00483871
	2.322	0.00483871
	2.402	0.00483871
	2.481	0.00483871
	2.602	0.00483871
	2.695	0.00483871
	2.802	0.00483871
	2.961	0.00483871
	3.081	0.00483871
	3.241	0.00483871
	3.428	0.00483871
	3.654	0.0112903
	3.88	0.016129
	4.174	0.016129
	4.481	0.016129
	4.827	0.0209677
	5.267	0.0209677
	5.813	0.0209677
	6.373	0.0209677
	7.134	0.0322581
	7.99	0.0370968
	8.923	0.0370968
	9.909	0.0435484
	11.296	0.0532258
	12.603	0.0532258
	14.34	0.0693548
	15.953	0.0806452
	17.912	0.0854839
	20.046	0.101613
	22.233	0.117742
	19.538	0.117742
	20.842	0.117742
	23.298	0.129032
	24.511	0.133871
	26.951	0.15
	30.047	0.172581
	33.312	0.198387
	36.821	0.225806
	40.449	0.258065
	44.193	0.290323
	48.059	0.322581
	51.901	0.359677
	56.301	0.403226
	59.888	0.446774
	63.702	0.48871
	67.354	0.537097
	71.288	0.585484
	74.62	0.633871
	77.769	0.693548
	80.543	0.746774
	83.05	0.795161
	85.319	0.859677
	87.251	0.919355
	88.958	0.972581
	90.306	1.0371
	91.414	1.10161
	92.361	1.16129
	93.177	1.21452
	93.752	1.27419
	94.155	1.33871
	94.441	1.39194
	94.611	1.45645
	94.727	1.51129
	94.84	1.56935
	94.91	1.6129
	94.897	1.67258
	94.806	1.72097
	94.794	1.77419
	94.754	1.82258
	94.676	1.86613
	94.635	1.90806
	94.569	1.95645
	94.477	2
	94.305	2.04839
	94.158	2.09194
	94.146	2.12903
	94.16	2.16613
	94.135	2.20968
	94.029	2.24194
	93.948	2.27903
	93.936	2.31774
	93.908	2.35484
	93.882	2.39194
	93.829	2.42419
	93.844	2.45645
	93.869	2.48871
	93.883	2.52097
	93.885	2.55323
	93.858	2.58548
	93.831	2.61774
	93.831	2.65
	93.832	2.68226
	93.833	2.71452
	93.873	2.74677
	93.886	2.77903
	93.886	2.81129
	93.873	2.84355
	93.872	2.86613
	93.859	2.89839
	93.834	2.93065
	93.741	2.95645
	93.728	2.98871
	93.728	3.02097
	93.782	3.04839
	93.795	3.08065
	93.781	3.10806
	93.768	3.13387
	93.782	3.16613
	93.807	3.19355
	93.847	3.22097
	93.888	3.24677
	93.903	3.27903
	93.889	3.31129
	93.889	3.33387
	93.929	3.35968
	93.983	3.39194
	94.036	3.41935
	94.102	3.44677
	94.129	3.47903
	94.143	3.50484
	94.196	3.52742
	94.248	3.55968
	94.275	3.58548
	94.288	3.61774
	94.302	3.64032
	94.302	3.66613
	94.275	3.69839
	94.288	3.72097
	94.369	3.75323
	94.489	3.77903
	94.542	3.80645
	94.569	3.83387
	94.582	3.86613
	94.582	3.89194
	94.581	3.91935
	94.595	3.94677
	94.609	3.97258
	94.648	4
	94.661	4.02742
	94.689	4.05323
	94.768	4.08548
	94.808	4.1129
	94.834	4.14032
	94.861	4.16613
	94.888	4.19355
	94.914	4.22097
	94.914	4.24677
	94.901	4.27903
	94.888	4.30161
	94.914	4.33387
	94.981	4.35968
	95.022	4.3871
	95.036	4.41452
	95.049	4.44677
	95.049	4.47258
	95.073	4.49516
	95.089	4.52742
	95.156	4.55323
	95.17	4.58548
	95.183	4.60806
	95.21	4.64032
	95.277	4.66613
	95.303	4.68871
	95.356	4.72097
	95.423	4.74677
	95.479	4.77903
	95.559	4.80161
	95.598	4.83387
	95.598	4.85968
	95.571	4.88226
	95.544	4.91452
	95.583	4.94677
	95.611	4.9629
	95.663	4.99516
	95.718	5.02742
	95.744	5.05323
	95.759	5.07581
	95.759	5.10806
	95.783	5.13387
	95.811	5.16129
	95.811	5.18871
	95.823	5.22097
	95.81	5.24677
	95.797	5.27419
	95.8	5.30161
	95.84	5.32742
	95.906	5.35968
	95.959	5.38226
	95.971	5.41452
	96.011	5.44032
	96.038	5.4629
	96.08	5.49516
	96.103	5.52097
	96.161	5.54355
	96.214	5.57581
	96.321	5.60161
	96.386	5.62419
	96.427	5.65645
	96.425	5.68871
	96.41	5.71452
	96.359	5.74194
	96.308	5.76935
	96.307	5.80161
	96.319	5.82742
	96.372	5.85
	96.399	5.88226
	96.456	5.90806
	96.508	5.93065
	96.612	5.9629
	96.667	5.98871
	96.72	6.01613
	96.745	6.04355
	96.76	6.06935
	96.786	6.10161
	96.812	6.12419
	96.826	6.15645
	96.867	6.18226
	96.92	6.20968
	96.96	6.2371
	96.973	6.26935
	96.973	6.29032
	96.999	6.32258
	97.066	6.34355
	97.133	6.37097
	97.159	6.40323
	97.214	6.43065
	97.226	6.45161
	97.24	6.48387
	97.226	6.51129
	97.226	6.53226
	97.239	6.56452
	97.293	6.59194
	97.347	6.6129
	97.387	6.64516
	97.426	6.67742
	97.454	6.69355
	97.48	6.72581
	97.506	6.75806
	97.546	6.77903
	97.586	6.80645
	97.625	6.83871
	97.667	6.85484
	97.734	6.8871
	97.799	6.91935
	97.866	6.93548
	97.933	6.96774
	98.001	6.99516
	98.041	7.01613
	98.053	7.04839
	98.041	7.08065
	98.001	7.09677
	97.947	7.12903
	97.934	7.15645
	97.975	7.17742
	98.042	7.20968
	98.108	7.2371
	98.135	7.25806
	98.175	7.29032
	98.214	7.32258
	98.24	7.33871
	98.254	7.37097
	98.307	7.39839
	98.335	7.42419
	98.361	7.45161
	98.362	7.47258
	98.375	7.50484
	98.361	7.53226
	98.321	7.55323
	98.267	7.58548
	98.281	7.6129
	98.282	7.64032
	98.307	7.66613
	98.334	7.69355
	98.387	7.72097
	98.426	7.74677
	98.466	7.77419
	98.506	7.80161
	98.561	7.82742
	98.601	7.85
	98.641	7.88226
	98.667	7.90806
	98.68	7.93065
	98.734	7.95645
	98.761	7.98387
	98.834	8.01129
	98.841	8.0371
	98.76	8.09194
	96.932	8.09194
	96.827	8.09194
	96.639	8.09194
	96.468	8.09677
	96.333	8.09677
	96.225	8.09677
	96.119	8.09677
	96.051	8.09677
	95.972	8.09677
	95.89	8.09677
	95.841	8.10161
	95.209	8.10161
	95.215	8.10161
	95.197	8.10161
	95.184	8.10161
	95.171	8.10161
	95.148	8.10161
	95.16	8.10161
	95.147	8.10161
	95.135	8.10161
	95.131	8.10161
	95.117	8.10161
	95.118	8.10161
	95.092	8.10161
	95.078	8.10806
	95.078	8.10806
	95.067	8.10806
	95.051	8.10806
	95.052	8.10806
	95.038	8.10806
	95.04	8.10806
	95.039	8.10806
	95.023	8.10806
	95.014	8.10806
	95	8.10806
	94.973	8.10806
	94.956	8.10806
	94.927	8.10806
	94.917	8.10806
	94.889	8.10806
	94.862	8.10806

## Sheet: H,W,D
	Differential Stress	Strain			Differential Stress	Strain			Differential Stress	Strain			Diff. Stress	Strain			Diff. Stress	Strain			Diff Stress MPa	Strain %			Diff. stress	Strain			Diff. Stress	Strain				Differential Stress	Strain
W3	1.574	-0.0209688		D2	3.788	0		W1	1.774	0		W4	2.187	0		H2	1.454	0.0532224		H1	1.494	0		W2	1.174	0		D1	1.606	0			V	0.686	0
BA-2, 50 MPa, Pf 40 MPa, RT, wet, 9.7*10^-5s^-1	1.561	-0.0209688		AA-3, 50 Mpa, RT, dry, 9*1-^-5s^-1	4.722	0.00483933		AA-5, 50 Mpa, wet, Pf 40 Mpa, strain rate 4.37*10^-5s^-1	1.774	0		BA-5, 50 Mpa, wet, 40 MPa, 9.7*10^-5s^-1	2.708	0		50 MPa, 40 MPa, water induced at 100 MPa, Held at 8 MPa for 6 hrs, then failure	1.454	0.0532224		hydration	1.481	0		duct	1.187	0		duct dry	1.606	0			AA-5, 50 Mpa, dry, strain rate 1*10^-6s^-1	0.7	0
Anh2-2 (wet)	1.574	-0.0209688		Anh2-1 (dry)	5.909	0.0112918		wet	1.774	0		wet	3.135	0		Hydration exp	1.454	0.0532224			1.494	0			1.174	0			1.606	0			dry	0.699	0
wet	1.547	-0.0209688		dry	7.376	0.0112918			1.774	0			4.055	0		0.006	1.441	0.0532224			1.494	0			1.174	0			1.62	0			0.0159838	0.685	0
	1.547	-0.0209688			8.91	0.0274229			1.761	0			5.335	0			1.454	0.0532224			1.494	0			1.16	0			1.622	0				0.686	0
	1.547	-0.0209688			10.617	0.0274229			1.761	0			6.949	0			1.467	0.0532224			1.507	0			1.161	0			1.621	0				0.672	0
	1.547	-0.0209688			12.551	0.043554			1.774	0			8.95	0			1.454	0.0532224			1.507	0			1.162	0			1.636	0				0.674	0
	1.534	-0.0209688			14.832	0.0596851			1.801	0			11.231	0			1.454	0.0532224			1.507	0			1.162	0			1.637	0				0.673	0
	1.534	-0.0209688			17.26	0.0693638			1.801	0			13.765	0.0161535			1.441	0.0532224			1.507	0			1.162	0			1.638	0				0.674	0
	1.534	-0.0209688			20.101	0.0758162			1.801	0			16.66	0.032307			1.454	0.0532224			1.507	0			1.162	0			1.638	0				0.674	0
	1.547	-0.0209688			22.889	0.0919473			1.814	0			19.661	0.0484606			1.441	0.0532224			1.507	0			1.162	0			1.636	0				0.688	0
	1.547	-0.0209688			18.954	0.0967867			1.827	0			18.194	0.059768			1.441	0.0532224			1.494	0			1.162	0			1.65	0				0.687	0
	1.561	-0.0209688			22.022	0.101626			1.827	0			20.261	0.059768			1.454	0.0532224			1.494	0			1.163	0			1.651	0				0.678	0
	1.547	-0.0209688			25.023	0.108078			1.841	0			23.089	0.0694601			1.454	0.032256			1.494	0			1.162	0			1.65	0				0.679	0.00483871
	1.534	-0.0209688			28.131	0.12421			1.881	0			26.583	0.0856137			1.441	0			1.521	0			1.163	0			1.65	0				0.68	0.00483871
	1.521	-0.0209688			30.585	0.140341			1.974	0			29.171	0.101767			1.454	0			1.574	0			1.163	0			1.636	0				0.681	0.00483871
	1.534	-0.0209688			35.16	0.161311			2.121	0			34.36	0.134074			1.454	0			1.681	0			1.176	0			1.636	0				0.681	0.00483871
	1.534	-0.0209688			40.509	0.188734			2.308	0			39.788	0.161535			1.454	0			1.881	0			1.164	0			1.636	0				0.681	0.00483871
	1.521	-0.0209688			46.098	0.220996			2.548	0			46.031	0.198688			1.453	0			2.161	0			1.163	0			1.624	0				0.68	0.00483871
	1.561	-0.0209688			52.14	0.253258			2.801	0			52.5	0.242303			1.454	0			2.588	0			1.164	0			1.623	0				0.692	0.00483871
	1.734	-0.0209688			58.556	0.295199			2.974	0			59.102	0.285917			1.454	0			3.215	0			1.164	0			1.622	0				0.692	0.00483871
	2.027	-0.0209688			65.785	0.333914			3.135	0			66.519	0.327917			1.467	0			4.162	0			1.163	0			1.636	0				0.679	0.00483871
	2.441	-0.0209688			72.881	0.375855			3.561	0			74.108	0.382838			1.467	0			5.309	0			1.163	0			1.623	0				0.678	0.00483871
	3.001	-0.0209688			80.204	0.424248			4.135	0			81.471	0.436145			1.481	0			6.603	0			1.164	0			1.636	0				0.692	0.00483871
	3.215	-0.0209688			88.287	0.467802			4.788	0			88.794	0.484606			1.481	0			7.923	0.0048324			1.163	0			1.623	0				0.692	0.00483871
	4.068	-0.0209688			95.756	0.516196			5.509	0			96.397	0.544374			1.494	0			9.324	0.0048324			1.163	0			1.636	0				0.706	0.00483871
	5.122	-0.0209688			103.373	0.55975			6.296	0			103.879	0.602526			1.507	0			11.031	0.016108			1.164	0			1.635	0.00485241				0.705	0.00483871
	6.349	-0.0209688			110.815	0.612982			7.176	0			110.802	0.662294			1.534	0			12.698	0.0209404			1.164	0			1.636	0				0.718	0.00483871
	7.683	-0.0209688			118.765	0.661376			8.083	0			118.032	0.726909			1.561	0			14.726	0.0370484			1.164	0			1.649	0.00485241				0.731	0.00483871
	9.163	-0.0209688			126.168	0.709769			9.11	0			124.541	0.786677			1.561	0			16.833	0.048324			1.164	0			1.65	0.00485241				0.73	0.00483871
	11.004	-0.0209688			133.904	0.763002			10.284	0			130.77	0.844829			1.587	0			19.287	0.064432			1.164	0			1.635	0.0161747				0.731	0.00483871
	12.925	-0.0209688			141.054	0.817847			11.418	0			136.999	0.915905			1.614	0			18.767	0.0692643			1.151	0			1.636	0.00485241				0.745	0.00483871
	14.779	-0.00483894			148.11	0.87108			12.685	0			142.854	0.974057			1.667	0			19.261	0.0692643			1.152	0			1.649	0.0113223				0.745	0.00483871
	16.62	0			155.246	0.924313			14.165	0.00485751			147.977	1.03867			1.694	0			21.582	0.0757075			1.152	0			1.649	0.0113223				0.758	0.00483871
	18.767	0.0112909			161.595	0.979159			15.619	0.0113342			152.885	1.10975			1.761	0			23.436	0.0853723			1.171	0			1.651	0.00485241				0.756	0.00483871
	21.168	0.0274207			168.024	1.03723			16.78	0.0113342			157.22	1.17921			1.801	0			26.09	0.10148			1.171	0			1.65	0.0113223				0.783	0.00483871
	18.807	0.0370986			173.773	1.09692			18.14	0.0275259			160.968	1.24382			1.854	0			27.811	0.107924			1.17	0			1.637	0.0113223				0.797	0.00483871
	20.941	0.0370986			179.482	1.16144			19.567	0.0437176			164.289	1.32459			1.934	0			32.039	0.133696			1.156	0			1.651	0.0113223				0.81	0.00483871
	22.502	0.0370986			184.363	1.22596			21.128	0.0534326			166.85	1.40051			2.001	0			36.359	0.156247			1.156	0			1.664	0.0113223				0.81	0.00483871
	25.103	0.0483894			188.805	1.29049			22.595	0.0599093			168.345	1.47482			2.134	0			41.389	0.18202			1.156	0			1.665	0.0113223				0.824	0.00483871
	25.17	0.0596803			193.02	1.35985			20.621	0.076101			169.064	1.55558			2.228	0			46.564	0.214236			1.17	0			1.666	0.0161747				0.836	0.00483871
	29.531	0.0758101			196.328	1.42438			20.128	0.076101			168.824	1.64766			2.308	0			52.433	0.246452			1.17	0			1.665	0.0161747				0.862	0.00483871
	33.586	0.0967789			199.356	1.49535			21.288	0.076101			167.33	1.73973			2.441	0.0048384			58.436	0.285111			1.169	0			1.665	0.0113223				0.876	0.00483871
	38.068	0.1242			201.783	1.56956			22.769	0.076101			164.396	1.83666			2.614	0.0048384			65.038	0.32216			1.155	0			1.666	0.0113223				0.889	0.00483871
	43.11	0.150007			203.824	1.64053			24.676	0.076101			159.007	1.94327			2.788	0.0048384			71.561	0.365651			1.155	0			1.665	0.0161747				0.916	0.00483871
	48.272	0.188719			205.505	1.71474			26.383	0.0922927			149.35	2.08865			2.988	0.0048384			78.803	0.407532			1.142	0			1.652	0.0161747				0.929	0.00483871
	53.834	0.225817			206.985	1.78571			28.157	0.108484			115.324	2.42303			3.228	0.0048384			85.633	0.451024			1.155	0			1.654	0.0161747				0.943	0.00483871
	59.636	0.258077			208.172	1.85508			30.038	0.118199			74.735	2.79941			3.548	0.0112896			92.995	0.494515			1.155	0			1.654	0.0161747				0.955	0.00483871
	65.732	0.301627			209.146	1.92444			31.945	0.134391			59.703	2.93994			3.962	0.0112896			99.838	0.542839			1.155	0			1.64	0.0161747				0.983	0.00483871
	72.414	0.343565			209.853	1.98897			31.785	0.140868			51.446	3.04171			4.442	0.0112896			100.892	0.558947			1.155	0			1.64	0.0161747				1.008	0.00483871
	78.817	0.387116			210.467	2.05994			35.04	0.15706			48.952	3.07402			5.095	0.016128			100.345	0.558947			1.155	0			1.64	0.0161747				1.048	0.00483871
	85.259	0.435505			211.107	2.11802			37.588	0.173251			47.858	3.09017			5.976	0.016128			99.998	0.56378			1.155	0			1.641	0.0161747				1.077	0.00483871
	92.035	0.488733			211.587	2.17286			40.442	0.189443			47.311	3.10632			7.176	0.0274176			99.692	0.56378			1.169	0			1.641	0.0161747				1.104	0.00483871
	98.451	0.537123			212.014	2.23739			43.202	0.210492			46.898	3.10632			8.777	0.0274176			99.371	0.56378			1.169	0			1.628	0.0161747				1.131	0.00483871
	104.72	0.585512			212.321	2.29546			46.244	0.231541			46.631	3.12248			10.844	0.0435456			99.184	0.56378			1.169	0			1.629	0.0161747				1.157	0.00483871
	111.402	0.633902			212.534	2.35998			49.179	0.259067			46.391	3.12248			13.578	0.0596736			100.025	0.56378			1.154	0			1.642	0.0161747				1.224	0.00483871
	117.391	0.688743			212.774	2.41483			52.287	0.280117			46.191	3.12248			16.886	0.0758016			100.145	0.568612			1.168	0			1.628	0.0161747				1.238	0.00483871
	123.367	0.741971			213.054	2.4729			55.408	0.307642			45.951	3.12248			21.168	0.0919296			100.171	0.568612			1.155	0			1.628	0.0161747				1.291	0.00483871
	129.342	0.801652			213.254	2.52775			58.702	0.328692			45.804	3.13378			19.714	0.0919296			100.185	0.575055			1.156	0			1.628	0.0161747				1.318	0.00483871
	134.851	0.850041			213.388	2.57614			61.77	0.356218			45.697	3.13863			23.049	0.108058			100.225	0.575055			1.17	0			1.629	0.0161747				1.372	0.00483871
	140.067	0.91456			213.534	2.62937			65.145	0.377267							26.917	0.124186			100.225	0.575055			1.156	0			1.641	0.0161747				1.438	0.00483871
	145.349	0.967789			213.681	2.6826			68.293	0.404793							33.386	0.16128			100.225	0.575055			1.17	0			1.642	0.0161747				1.477	0.00483871
	149.95	1.03231			213.815	2.73745			71.627	0.425842							40.976	0.198374			100.238	0.575055			1.17	0			1.642	0.0161747				1.557	0.00483871
	154.232	1.09683			213.948	2.78584			74.655	0.458225							48.992	0.246758			100.225	0.575055			1.17	0			1.643	0.0161747				1.611	0.00483871
	158.3	1.15006			214.028	2.83424			77.91	0.480894							58.516	0.306432			100.225	0.575055			1.183	0			1.656	0.0161747				1.625	0.00483871
	161.781	1.21457			214.095	2.88263			80.924	0.513277							68.239	0.366105			100.225	0.575055			1.184	0			1.656	0.0161747				1.625	0.00483871
	164.849	1.27909			214.161	2.92457			84.045	0.539184							79.097	0.430617			100.225	0.575055			1.184	0			1.656	0.0161747				1.638	0.00483871
	167.45	1.34361			214.295	2.95683			86.993	0.56671							89.487	0.499968			100.238	0.575055			1.171	0			1.656	0.0161747				1.625	0.00483871
	169.504	1.41942			214.428	2.9891			89.861	0.594236							100.572	0.56448			100.211	0.575055			1.184	0			1.669	0.0161747				1.625	0.00483871
	170.665	1.49523			214.548	3.02781			92.675	0.626619							108.495	0.624153			100.238	0.575055			1.184	0			1.67	0.0161747				1.626	0.00483871
	170.918	1.57588			214.668	3.06007			95.53	0.652526							107.614	0.63383			100.238	0.575055			1.184	0			1.684	0.0161747				1.625	0.00483871
	168.544	1.67266			214.748	3.10201			97.971	0.675194							107.014	0.63383			100.225	0.575055			1.183	0			1.685	0.0161747				1.624	0.00483871
	163.555	1.77428			214.762	3.14073			100.705	0.707578							106.627	0.63383			100.225	0.575055			1.184	0			1.684	0.0161747				1.625	0.00483871
	156.966	1.89848			214.802	3.17299			103.133	0.739961							106.24	0.63383			100.211	0.575055			1.171	0			1.685	0.0161747				1.613	0.00483871
	146.055	2.04849			214.802	3.21009			105.44	0.76101							105.854	0.63383			100.225	0.575055			1.183	0			1.697	0.0161747				1.613	0.00483871
	132.77	2.19849			214.775	3.24719			107.774	0.788536							105.787	0.63383			100.211	0.575055			1.183	0			1.71	0.0161747				1.598	0.00483871
	116.327	2.37592			214.762	3.29075			109.908	0.82092							105.801	0.63383			100.225	0.575055			1.184	0			1.71	0.0161747				1.613	0.00483871
	97.797	2.54851			214.695	3.32785			111.829	0.853303							105.814	0.63383			100.224	0.575055			1.184	0			1.711	0.0161747				1.613	0.00483871
	85.526	2.62916			214.548	3.36656			113.777	0.87921							105.814	0.63383			100.211	0.575055			1.183	0			1.711	0.0161747				1.613	0.00483871
	74.068	2.70497			214.375	3.4085			115.484	0.906736							105.814	0.63383			100.225	0.575055			1.197	0			1.725	0.0161747				1.612	0.00483871
	66.332	2.75336			214.228	3.44722			117.004	0.934262							105.814	0.63383			100.225	0.575055			1.196	0			1.738	0.0161747				1.612	0.00483871
	60.69	2.7953			214.095	3.48916			118.552	0.966645							105.84	0.63383			100.225	0.575055			1.198	0			1.738	0.0161747				1.613	0.00483871
					214.028	3.53271			119.832	0.999028							105.827	0.63383			100.211	0.575055			1.197	0			1.751	0.0161747				1.612	0.00483871
					213.988	3.56982			120.899	1.02494							105.814	0.63383			100.198	0.575055			1.197	0			1.752	0.0161747				1.598	0.00483871
					213.895	3.60853			121.74	1.05732							105.814	0.63383			100.211	0.575055			1.198	0			1.765	0.0161747				1.612	0.00483871
					213.721	3.65047			122.366	1.0897							105.84	0.63383			100.198	0.575055			1.198	0			1.766	0.0161747				1.613	0.00483871
					213.468	3.69403			122.66	1.12856							105.84	0.640281			100.198	0.579888			1.198	0			1.779	0.0161747				1.598	0.00483871
					213.148	3.73758			122.687	1.16095							105.827	0.640281			100.185	0.579888			1.197	0			1.792	0.0161747				1.612	0.00483871
					212.868	3.77468			122.313	1.20304							105.814	0.640281			100.185	0.579888			1.211	0			1.792	0.0161747				1.612	0.00483871
					212.534	3.81823			121.459	1.23543							105.84	0.640281			100.211	0.579888			1.211	0			1.806	0.0161747				1.612	0.00483871
					212.334	3.86018			120.206	1.27915							105.84	0.640281			100.198	0.579888			1.213	0			1.806	0.0161747				1.613	0.00483871
					212.174	3.90373			118.392	1.31639							105.854	0.640281			100.185	0.579888			1.213	0			1.819	0.0161747				1.613	0.00483871
					212.054	3.94728			115.724	1.36496							105.84	0.640281			100.211	0.58472			1.226	0			1.832	0.0161747				1.599	0.00483871
					211.974	3.98922			112.376	1.41354							105.827	0.640281			100.225	0.58472			1.226	0			1.82	0.0161747				1.603	0.00483871
					211.854	4.03278			107.294	1.4783							105.814	0.640281			100.211	0.58472			1.239	0			1.833	0.0161747				1.605	0.00483871
					211.614	4.07633			98.184	1.56574							105.827	0.640281			100.225	0.591163			1.239	0			1.846	0.0161747				1.604	0.00483871
					211.387	4.11827			55.514	1.94786							105.827	0.640281			100.225	0.591163			1.227	0			1.847	0.0161747				1.619	0.00483871
					210.933	4.16667			44.59	2.04501							105.827	0.640281			100.225	0.591163			1.227	0			1.86	0.0161747				1.618	0.00483871
					209.44	4.21506			42.843	2.0612							105.827	0.640281			100.225	0.591163			1.24	0			1.86	0.0161747				1.632	0.00483871
					206.732	4.26345			42.523	2.06768							105.827	0.640281			100.225	0.591163			1.24	0			1.872	0.0161747				1.631	0.00483871
					205.531	4.29088			42.296	2.06768							105.854	0.640281			100.225	0.591163			1.255	0			1.888	0.0161747				1.631	0.00483871
					204.891	4.31185			42.123	2.0774							105.88	0.640281			100.211	0.591163			1.255	0			1.899	0.0161747				1.645	0.00483871
					204.638	4.33927			41.989	2.08387							105.867	0.640281			100.211	0.591163			1.268	0			1.913	0.0161747				1.658	0.00483871
					204.384	4.36024			41.869	2.08387							105.867	0.640281			100.225	0.591163			1.268	0			1.913	0.0161747				1.67	0.00483871
					204.091	4.38282			41.789	2.08387							105.867	0.640281			100.211	0.591163			1.283	0			1.914	0.0161747				1.671	0.00483871
					203.837	4.40863			41.709	2.08387							105.867	0.640281			100.211	0.591163			1.309	0			1.94	0.0161747				1.698	0.00483871
					203.597	4.43606			41.629	2.09359							105.894	0.640281			100.211	0.591163			1.321	0			1.94	0.0161747				1.723	0.00483871
					203.544	4.45703			41.576	2.09359							105.894	0.640281			100.211	0.591163			1.337	0			1.967	0.0161747				1.75	0.00483871
					203.651	4.48445			41.509	2.09359							105.88	0.64512			100.198	0.591163			1.349	0			1.98	0.0161747				1.75	0.00483871
					203.757	4.51187											105.88	0.64512			100.198	0.591163			1.349	0			1.979	0.0161747				1.79	0.00483871
					203.851	4.53768											105.894	0.64512			100.211	0.591163			1.362	0			2.006	0.0161747				1.816	0.00483871
					203.877	4.56511											105.907	0.64512			100.225	0.591163			1.362	0			2.02	0.0161747				1.857	0.00483871
					203.637	4.59737											105.907	0.64512			100.051	0.607271			1.362	0			2.047	0.0161747				1.868	0.00483871
					199.049	4.64092											105.907	0.64512			100.225	0.612104			1.376	0			2.073	0.0161747				1.909	0.00483871
					198.222	4.67318											105.907	0.64512			100.211	0.612104			1.376	0			2.088	0.0161747				1.961	0.00483871
					198.169	4.69899											105.907	0.64512			100.211	0.612104			1.39	0			2.101	0.0161747				1.988	0.00483871
					198.262	4.73126											105.92	0.64512			100.238	0.612104			1.389	0			2.114	0.0161747				2.041	0.00483871
					198.342	4.76352											105.92	0.64512			100.238	0.612104			1.402	0			2.14	0.0161747				2.095	0.00483871
					198.395	4.79578											105.907	0.64512			100.225	0.612104			1.402	0			2.167	0.0161747				2.135	0.00483871
					198.369	4.8232											105.92	0.64512			100.211	0.612104			1.416	0			2.181	0.0161747				2.188	0.00483871
					197.982	4.93612											105.92	0.64512			100.225	0.612104			1.43	0			2.194	0.0161747				2.268	0.00483871
					197.982	4.93612											105.934	0.64512			100.238	0.612104			1.444	0			2.22	0.0161747				2.322	0.00483871
					197.982	4.93612											105.947	0.64512			100.225	0.612104			1.458	0			2.233	0.0161747				2.402	0.00483871
					197.982	4.94096											105.92	0.64512			100.238	0.612104			1.459	0			2.262	0.0161747				2.481	0.00483871
					197.929	4.94096											105.92	0.64512			100.238	0.612104			1.472	0			2.273	0.0161747				2.602	0.00483871
																	105.934	0.64512			100.225	0.616936			1.485	0			2.287	0.0161747				2.695	0.00483871
																	105.947	0.64512			100.225	0.616936			1.5	0			2.313	0.0161747				2.802	0.00483871
																	105.947	0.64512			100.251	0.616936			1.5	0			2.329	0.0161747				2.961	0.00483871
																	105.934	0.64512			100.238	0.616936			1.526	0			2.353	0.0161747				3.081	0.00483871
																	105.92	0.64512			100.251	0.623379			1.526	0			2.379	0.0161747				3.241	0.00483871
																	105.92	0.64512			100.238	0.623379			1.539	0			2.394	0.0161747				3.428	0.00483871
																	105.92	0.64512			100.238	0.623379			1.552	0			2.434	0.0161747				3.654	0.0112903
																	105.92	0.64512			100.238	0.623379			1.565	0			2.474	0.0161747				3.88	0.016129
																	105.92	0.64512			100.225	0.623379			1.566	0			2.514	0.0161747				4.174	0.016129
																	105.934	0.64512			100.238	0.623379			1.58	0			2.569	0.0161747				4.481	0.016129
																	105.934	0.64512			100.225	0.623379			1.606	0			2.595	0.0161747				4.827	0.0209677
																	105.92	0.649958			100.238	0.623379			1.605	0			2.621	0.0161747				5.267	0.0209677
																	105.934	0.649958			100.251	0.623379			1.621	0			2.662	0.0161747				5.813	0.0209677
																	105.934	0.649958			100.238	0.623379			1.648	0			2.716	0.0161747				6.373	0.0209677
																	105.947	0.649958			100.238	0.623379			1.674	0			2.757	0.0161747				7.134	0.0322581
																	105.934	0.649958			100.225	0.623379			1.699	0			2.797	0.0161747				7.99	0.0370968
																	105.92	0.649958			100.251	0.623379			1.712	0			2.836	0.0161747				8.923	0.0370968
																	105.934	0.649958			100.251	0.623379			1.74	0			2.89	0.0161747				9.909	0.0435484
																	105.947	0.649958			100.251	0.623379			1.741	0			2.942	0.0161747				11.296	0.0532258
																	105.92	0.649958			100.265	0.623379			1.768	0			3.01	0.0161747				12.603	0.0532258
																	105.92	0.649958			100.238	0.623379			1.781	0			3.078	0.0161747				14.34	0.0693548
																	105.92	0.649958			100.265	0.623379			1.793	0			3.116	0.0161747				15.953	0.0806452
																	105.934	0.649958			100.238	0.623379			1.82	0			3.17	0.0161747				17.912	0.0854839
																	105.947	0.649958			100.225	0.623379			1.833	0			3.197	0.0161747				20.046	0.101613
																	105.934	0.649958			100.238	0.623379			1.86	0			3.222	0.0161747				22.233	0.117742
																	105.934	0.649958			100.225	0.623379			1.874	0			3.276	0.0161747				19.538	0.117742
																	105.92	0.649958			100.238	0.623379			1.888	0			3.317	0.0161747				20.842	0.117742
																	105.947	0.649958			100.238	0.623379			1.927	0			3.383	0.0161747				23.298	0.129032
																	105.947	0.649958			100.225	0.623379			1.939	0			3.491	0.0161747				24.511	0.133871
																	105.934	0.649958			100.225	0.623379			1.966	0			3.598	0.0161747				26.951	0.15
																	105.947	0.649958			100.225	0.628212			1.992	0			3.707	0.0161747				30.047	0.172581
																	105.947	0.649958			100.225	0.628212			2.006	0			3.759	0.0161747				33.312	0.198387
																	105.947	0.649958			100.238	0.628212			2.047	0			3.851	0.0161747				36.821	0.225806
																	105.96	0.649958			100.238	0.628212			2.074	0			3.971	0.0161747				40.449	0.258065
																	105.947	0.649958			100.225	0.628212			2.101	0			4.092	0.0161747				44.193	0.290323
																	105.947	0.649958			100.238	0.628212			2.128	0			4.24	0.0161747				48.059	0.322581
																	105.947	0.656409			100.211	0.628212			2.154	0			4.399	0.0210271				51.901	0.359677
																	105.96	0.656409			100.225	0.628212			2.194	0			4.535	0.0161747				56.301	0.403226
																	105.96	0.656409			100.225	0.628212			2.207	0			4.72	0.0161747				59.888	0.446774
																	105.946	0.656409			100.238	0.628212			2.233	0			4.881	0.0210271				63.702	0.48871
																	105.96	0.656409			100.225	0.628212			2.274	0			5.068	0.0210271				67.354	0.537097
																	105.947	0.656409			100.225	0.628212			2.341	0			5.215	0.0323494				71.288	0.585484
																	105.947	0.656409			100.251	0.628212			2.381	0			5.361	0.0323494				74.62	0.633871
																	105.974	0.656409			100.251	0.628212			2.433	0			5.522	0.0323494				77.769	0.693548
																	105.96	0.656409			100.238	0.633044			2.462	0			5.723	0.0323494				80.543	0.746774
																	105.947	0.656409			100.251	0.633044			2.513	0			5.869	0.0323494				83.05	0.795161
																	105.947	0.656409			100.238	0.633044			2.555	0			6.069	0.0323494				85.319	0.859677
																	105.96	0.656409			100.251	0.633044			2.609	0			6.23	0.0323494				87.251	0.919355
																	105.96	0.656409			100.251	0.633044			2.663	0			6.443	0.0323494				88.958	0.972581
																	105.934	0.656409			100.225	0.633044			2.716	0			6.656	0.0323494				90.306	1.0371
																	105.934	0.656409			100.238	0.639487			2.769	0			6.855	0.0323494				91.414	1.10161
																	105.934	0.656409			100.225	0.639487			2.823	0			7.057	0.0323494				92.361	1.16129
																	105.934	0.656409			100.238	0.639487			2.902	0			7.283	0.0323494				93.177	1.21452
																	105.934	0.656409			100.251	0.639487			2.97	0			7.523	0.0323494				93.752	1.27419
																	105.934	0.656409			100.238	0.639487			3.036	0			7.79	0.0323494				94.155	1.33871
																	105.907	0.656409			100.238	0.639487			3.116	0			8.029	0.0323494				94.441	1.39194
																	105.92	0.661248			100.225	0.639487			3.169	0			8.31	0.0323494				94.611	1.45645
																	105.934	0.661248			100.251	0.639487			3.183	0			8.577	0.0323494				94.727	1.51129
																	105.947	0.661248			100.238	0.639487			3.21	0			8.817	0.0323494				94.84	1.56935
																	105.934	0.661248			100.225	0.639487			3.277	0			9.124	0.0323494				94.91	1.6129
																	105.92	0.661248			100.225	0.639487			3.383	0			9.391	0.0323494				94.897	1.67258
																	105.934	0.661248			100.225	0.639487			3.464	0			9.711	0.0323494				94.806	1.72097
																	105.92	0.661248			100.238	0.639487			3.598	0			9.979	0.0323494				94.794	1.77419
																	105.92	0.661248			100.238	0.639487			3.705	0			10.272	0.0323494				94.754	1.82258
																	105.934	0.661248			100.225	0.639487			3.771	0			10.593	0.0323494				94.676	1.86613
																	105.92	0.661248			100.225	0.639487			3.905	0			10.927	0.0436717				94.635	1.90806
																	105.92	0.661248			100.225	0.639487			4.025	0			11.247	0.0436717				94.569	1.95645
																	105.907	0.661248			100.225	0.639487			4.171	0			11.554	0.0436717				94.477	2
																	105.92	0.661248			100.225	0.639487			4.345	0			11.873	0.0485241				94.305	2.04839
																	105.934	0.661248			100.225	0.639487			4.518	0			12.193	0.0485241				94.158	2.09194
																	105.92	0.661248			100.211	0.639487			4.678	0			12.486	0.0485241				94.146	2.12903
																	105.907	0.661248			100.211	0.639487			4.826	0			12.821	0.0485241				94.16	2.16613
																	105.92	0.661248			100.211	0.639487			5.012	0			13.169	0.0485241				94.135	2.20968
																	105.92	0.661248			100.225	0.639487			5.227	0			13.542	0.0485241				94.029	2.24194
																	105.934	0.661248			100.225	0.639487			5.4	0			13.849	0.0485241				93.948	2.27903
																	105.947	0.661248			100.225	0.639487			5.587	0			14.223	0.0485241				93.936	2.31774
																	105.947	0.661248			100.225	0.639487			5.814	0			14.571	0.0485241				93.908	2.35484
																	105.947	0.661248			100.238	0.639487			5.986	0			14.931	0.0485241				93.882	2.39194
																	105.947	0.661248			100.238	0.639487			6.189	0			15.359	0.0485241				93.829	2.42419
																	105.947	0.661248			100.238	0.64432			6.428	0			15.707	0.0485241				93.844	2.45645
																	105.934	0.661248			100.238	0.64432			6.655	0			16.119	0.0485241				93.869	2.48871
																	105.934	0.661248			100.251	0.64432			6.91	0			16.506	0.0485241				93.883	2.52097
																	105.934	0.661248			100.251	0.64432			7.137	0			16.921	0.0533765				93.885	2.55323
																	105.947	0.661248			100.251	0.64432			7.416	0			17.293	0.0598463				93.858	2.58548
																	105.96	0.661248			100.251	0.64432			7.696	0			17.493	0.0646987				93.831	2.61774
																	105.947	0.661248			100.251	0.64432			7.949	0			17.466	0.0646987				93.831	2.65
																	105.947	0.661248			100.251	0.64432			8.216	0			17.427	0.0646987				93.832	2.68226
																	105.947	0.661248			100.251	0.64432			8.496	0			17.442	0.0646987				93.833	2.71452
																	105.947	0.661248			100.251	0.64432			8.777	0			17.468	0.0646987				93.873	2.74677
																	105.96	0.661248			100.265	0.64432			9.044	0			17.522	0.0646987				93.886	2.77903
																	105.947	0.661248			100.251	0.64432			9.271	0			17.563	0.0646987				93.886	2.81129
																	105.934	0.661248			100.251	0.64432			9.564	0			17.629	0.0646987				93.873	2.84355
																	105.934	0.661248			100.251	0.64432			9.871	0			17.709	0.0646987				93.872	2.86613
																	105.934	0.661248			100.238	0.64432			10.151	0			17.79	0.0646987				93.859	2.89839
																	105.934	0.661248			100.238	0.64432			10.418	0			17.871	0.0646987				93.834	2.93065
																	105.947	0.661248			100.238	0.649152			10.711	0			17.937	0.0646987				93.741	2.95645
																	105.934	0.661248			100.238	0.649152			11.005	0			18.07	0.0646987				93.728	2.98871
																	105.92	0.661248			100.238	0.649152			11.271	0			18.258	0.0646987				93.728	3.02097
																	105.907	0.661248			100.251	0.649152			11.644	0			18.378	0.0646987				93.782	3.04839
																	105.907	0.661248			100.225	0.649152			11.965	0			18.524	0.0646987				93.795	3.08065
																	105.934	0.661248			100.238	0.649152			12.299	0			18.645	0.0646987				93.781	3.10806
																	105.92	0.661248			100.238	0.649152			12.658	0.0048448			18.779	0.0646987				93.768	3.13387
																	105.907	0.661248			100.225	0.649152			12.977	0.0048448			18.925	0.0646987				93.782	3.16613
																	105.92	0.661248			100.238	0.655595			13.285	0.0113045			19.072	0.0646987				93.807	3.19355
																	105.934	0.666086			100.238	0.655595			13.605	0.0113045			19.205	0.0646987				93.847	3.22097
																	105.947	0.666086			100.239	0.655595			13.925	0.0113045			19.352	0.0646987				93.888	3.24677
																	105.92	0.666086			100.225	0.655595			14.284	0.0113045			19.5	0.0646987				93.903	3.27903
																	105.907	0.666086			100.238	0.655595			14.616	0.0113045			19.647	0.0646987				93.889	3.31129
																	105.92	0.666086			100.238	0.655595			14.951	0.0113045			19.833	0.0646987				93.889	3.33387
																	105.947	0.666086			100.251	0.655595			15.311	0.0113045			20.048	0.0646987				93.929	3.35968
																	105.947	0.666086			100.238	0.655595			15.644	0.0113045			20.302	0.0646987				93.983	3.39194
																	105.947	0.666086			100.251	0.655595			16.072	0.0161493			20.449	0.0646987				94.036	3.41935
																	105.947	0.666086			100.251	0.655595			16.42	0.0161493			20.69	0.0646987				94.102	3.44677
																	105.934	0.666086			100.251	0.655595			16.767	0.0209942			20.891	0.0646987				94.129	3.47903
																	105.934	0.666086			100.251	0.655595			17.167	0.0209942			21.118	0.0646987				94.143	3.50484
																	105.947	0.666086			100.265	0.655595			17.541	0.0274539			21.318	0.0646987				94.196	3.52742
																	105.947	0.666086			100.265	0.655595			17.582	0.0274539			21.517	0.0646987				94.248	3.55968
																	105.934	0.666086			100.251	0.655595			17.555	0.0274539			21.731	0.0695512				94.275	3.58548
																	105.934	0.666086			100.251	0.655595			17.568	0.0274539			21.892	0.0695512				94.288	3.61774
																	105.934	0.666086			100.265	0.655595			17.622	0.0274539			22.092	0.076021				94.302	3.64032
																	105.947	0.666086			100.265	0.655595			17.689	0.0274539			22.318	0.076021				94.302	3.66613
																	105.96	0.666086			100.265	0.655595			17.797	0.0274539			22.519	0.076021				94.275	3.69839
																	105.947	0.666086			100.265	0.655595			17.877	0.0274539			22.773	0.076021				94.288	3.72097
																	105.947	0.666086			100.238	0.655595			17.971	0.0274539			22.985	0.076021				94.369	3.75323
																	105.92	0.666086			100.265	0.655595			18.078	0.0274539			23.212	0.076021				94.489	3.77903
																	105.947	0.666086			100.251	0.655595			18.172	0.0274539			23.44	0.076021				94.542	3.80645
																	105.974	0.666086			100.251	0.655595			18.292	0.0274539			23.667	0.076021				94.569	3.83387
																	105.96	0.666086			100.251	0.655595			18.412	0.0274539			23.881	0.0808734				94.582	3.86613
																	105.947	0.666086			100.265	0.655595			18.533	0.0274539			24.053	0.0808734				94.582	3.89194
																	105.96	0.666086			100.278	0.655595			18.666	0.0274539			24.241	0.0808734				94.581	3.91935
																	105.987	0.666086			100.278	0.655595			18.8	0.0274539			24.428	0.0808734				94.595	3.94677
																	105.987	0.666086			100.251	0.655595			18.946	0.0274539			24.64	0.0808734				94.609	3.97258
																	105.947	0.666086			100.225	0.655595			19.106	0.0274539			24.815	0.0808734				94.648	4
																	105.96	0.672537			100.238	0.655595			19.281	0.0274539			25.029	0.0808734				94.661	4.02742
																	105.96	0.672537			100.251	0.655595			19.467	0.0274539			25.228	0.0808734				94.689	4.05323
																	105.987	0.672537			100.238	0.655595			19.614	0.0274539			25.429	0.0808734				94.768	4.08548
																	105.96	0.672537			100.251	0.660428			19.774	0.0274539			25.617	0.0808734				94.808	4.1129
																	105.907	0.672537			100.265	0.660428			19.934	0.0322987			25.789	0.0808734				94.834	4.14032
																	105.947	0.672537			100.251	0.660428			20.081	0.0322987			25.989	0.0808734				94.861	4.16613
																	105.96	0.672537			100.251	0.660428			20.201	0.0322987			26.176	0.0808734				94.888	4.19355
																	105.934	0.672537			100.251	0.660428			20.361	0.0371435			26.35	0.0808734				94.914	4.22097
																	105.947	0.672537			100.251	0.660428			20.494	0.0371435			26.495	0.0808734				94.914	4.24677
																	105.894	0.672537			100.265	0.660428			20.614	0.0371435			26.669	0.0808734				94.901	4.27903
																	105.92	0.672537			100.238	0.660428			20.734	0.0371435			26.855	0.0808734				94.888	4.30161
																	105.92	0.672537			100.225	0.660428			20.881	0.0371435			27.07	0.0857258				94.914	4.33387
																	105.934	0.672537			100.238	0.660428			21.029	0.0371435			27.217	0.0857258				94.981	4.35968
																	105.96	0.677376			100.211	0.660428			21.162	0.0371435			27.363	0.0857258				95.022	4.3871
																	105.947	0.677376			100.225	0.660428			21.309	0.0436032			27.497	0.0857258				95.036	4.41452
																	105.947	0.677376			100.238	0.660428			21.442	0.0436032			27.576	0.0857258				95.049	4.44677
																	105.934	0.677376			100.225	0.660428			21.562	0.0436032			27.642	0.0921957				95.049	4.47258
																	105.947	0.677376			100.225	0.660428			21.696	0.0436032			27.682	0.0921957				95.073	4.49516
																	105.96	0.677376			100.238	0.660428			21.803	0.0436032			21.96	0.0921957				95.089	4.52742
																	105.974	0.677376			100.225	0.660428			21.936	0.0436032			22.466	0.0921957				95.156	4.55323
																	105.96	0.677376			100.225	0.660428			22.069	0.0436032			22.987	0.0921957				95.17	4.58548
																	105.947	0.677376			100.225	0.66526			22.216	0.0436032			23.441	0.0921957				95.183	4.60806
																	105.96	0.677376			100.238	0.66526			22.336	0.0436032			23.921	0.0921957				95.21	4.64032
																	105.974	0.677376			100.211	0.66526			22.483	0.0436032			24.335	0.0921957				95.277	4.66613
																	105.987	0.677376			100.225	0.66526			22.617	0.0436032			24.697	0.0921957				95.303	4.68871
																	105.974	0.677376			100.225	0.66526			22.777	0.0436032			25.082	0.0921957				95.356	4.72097
																	105.974	0.677376			100.225	0.66526			22.897	0.0436032			25.47	0.0921957				95.423	4.74677
																	105.974	0.677376			100.238	0.66526			23.083	0.0436032			25.777	0.0921957				95.479	4.77903
																	105.987	0.677376			100.225	0.66526			23.271	0.0436032			26.109	0.0921957				95.559	4.80161
																	106	0.677376			100.238	0.671703			23.457	0.0436032			26.39	0.0921957				95.598	4.83387
																	105.987	0.677376			100.225	0.671703			23.591	0.0436032			26.672	0.0921957				95.598	4.85968
																	105.987	0.677376			100.211	0.671703			23.777	0.0436032			26.938	0.0921957				95.571	4.88226
																	106	0.677376			100.211	0.671703			23.964	0.0436032			27.179	0.0921957				95.544	4.91452
																	106.014	0.677376			100.238	0.671703			24.124	0.0436032			27.394	0.0921957				95.583	4.94677
																	106	0.677376			100.238	0.671703			24.271	0.048448			27.633	0.0921957				95.611	4.9629
																	105.987	0.677376			100.238	0.671703			24.418	0.048448			27.903	0.0921957				95.663	4.99516
																	105.987	0.677376			100.225	0.671703			24.525	0.048448			28.128	0.0921957				95.718	5.02742
																	105.987	0.677376			100.225	0.671703			24.657	0.0532929			28.355	0.0921957				95.744	5.05323
																	106.014	0.677376			100.238	0.671703			24.751	0.0532929			28.57	0.0921957				95.759	5.07581
																	106.014	0.677376			100.238	0.671703			24.845	0.0532929			28.808	0.0921957				95.759	5.10806
																	106.014	0.677376			100.238	0.671703			24.979	0.0532929			29.037	0.0970481				95.783	5.13387
																	106	0.677376			100.225	0.671703			25.099	0.0532929			29.222	0.0970481				95.811	5.16129
																	106	0.677376			100.238	0.671703			25.192	0.0532929			29.422	0.0970481				95.811	5.18871
																	106.014	0.677376			100.251	0.671703			25.272	0.0532929			29.663	0.0970481				95.823	5.22097
																	106.014	0.677376			100.238	0.671703			25.395	0.0597526			29.904	0.0970481				95.81	5.24677
																	106	0.677376			100.251	0.671703			25.474	0.0597526			30.119	0.0970481				95.797	5.27419
																	106	0.677376			100.238	0.671703			25.54	0.0597526			30.439	0.0970481				95.8	5.30161
																	106.014	0.677376			100.251	0.671703			25.608	0.0597526			30.772	0.0970481				95.84	5.32742
																	106.014	0.677376			100.251	0.671703			25.675	0.0597526			31.078	0.0970481				95.906	5.35968
																	106.014	0.677376			100.238	0.671703			25.741	0.0597526			31.413	0.0970481				95.959	5.38226
																	106	0.677376			100.238	0.671703			25.795	0.0597526			31.721	0.0970481				95.971	5.41452
																	105.987	0.677376			100.225	0.671703			25.874	0.0597526			32.053	0.0970481				96.011	5.44032
																	105.987	0.677376			100.225	0.671703			25.955	0.0597526			32.373	0.0970481				96.038	5.4629
																	105.987	0.677376			100.251	0.671703			25.995	0.0597526			32.734	0.0970481				96.08	5.49516
																	106	0.677376			100.225	0.671703			26.062	0.0597526			33.041	0.101901				96.103	5.52097
																	105.987	0.677376			100.225	0.671703			26.1	0.0597526			33.361	0.101901				96.161	5.54355
																	105.974	0.677376			100.225	0.671703			26.141	0.0597526			33.656	0.10837				96.214	5.57581
																	105.987	0.677376			100.225	0.671703			26.236	0.0597526			33.922	0.10837				96.321	5.60161
																	106	0.677376			100.238	0.671703			26.302	0.0597526			34.215	0.10837				96.386	5.62419
																	106.027	0.677376			100.238	0.671703			26.355	0.0597526			34.549	0.10837				96.427	5.65645
																	106.014	0.677376			100.225	0.671703			26.394	0.0597526			34.87	0.10837				96.425	5.68871
																	106	0.677376			100.225	0.671703			26.434	0.0597526			35.217	0.10837				96.41	5.71452
																	106.014	0.677376			100.238	0.676535			26.449	0.0597526			35.497	0.113223				96.359	5.74194
																	106.04	0.677376			100.238	0.676535			26.435	0.0597526			35.856	0.113223				96.308	5.76935
																	106.067	0.677376			100.238	0.676535			26.422	0.0597526			36.138	0.113223				96.307	5.80161
																	106.054	0.677376			100.251	0.676535			26.408	0.0597526			36.431	0.113223				96.319	5.82742
																	106.027	0.677376			100.251	0.676535			26.355	0.0597526			36.751	0.113223				96.372	5.85
																	106.027	0.677376			100.238	0.676535			26.303	0.0597526			37.058	0.113223				96.399	5.88226
																	106.027	0.677376			100.251	0.676535			26.236	0.0597526			37.353	0.113223				96.456	5.90806
																	106.027	0.677376			100.265	0.676535			26.089	0.0597526			37.727	0.113223				96.508	5.93065
																	106.027	0.677376			100.238	0.676535			26.009	0.0597526			38.126	0.113223				96.612	5.9629
																	106.027	0.677376			100.238	0.676535			26.024	0.0597526			38.473	0.118075				96.667	5.98871
																	105.987	0.677376			100.238	0.676535			26.172	0.0597526			38.833	0.118075				96.72	6.01613
																	106	0.677376			100.251	0.676535			26.331	0.0597526			39.166	0.124545				96.745	6.04355
																	106.014	0.677376			100.251	0.676535			26.465	0.0597526			39.473	0.124545				96.76	6.06935
																	106	0.677376			100.251	0.676535			26.612	0.0597526			39.808	0.124545				96.786	6.10161
																	106	0.677376			100.251	0.676535			26.719	0.0597526			40.128	0.124545				96.812	6.12419
																	105.987	0.677376			100.238	0.676535			26.827	0.0597526			40.461	0.124545				96.826	6.15645
																	105.987	0.677376			100.265	0.676535			26.947	0.0597526			40.768	0.129397				96.867	6.18226
																	106.054	0.682214			100.251	0.681368			27.027	0.0597526			41.061	0.129397				96.92	6.20968
																	106.04	0.682214			100.251	0.681368			27.174	0.0597526			41.369	0.129397				96.96	6.2371
																	106	0.682214			100.265	0.681368			27.348	0.0597526			41.649	0.129397				96.973	6.26935
																	105.96	0.682214			100.265	0.681368			27.52	0.0597526			42.023	0.129397				96.973	6.29032
																	106.027	0.682214			100.265	0.681368			27.747	0.0597526			42.263	0.129397				96.999	6.32258
																	106.014	0.682214			100.251	0.681368			27.894	0.0597526			42.61	0.129397				97.066	6.34355
																	106.014	0.682214			100.251	0.681368			28.068	0.0645974			42.93	0.129397				97.133	6.37097
																	106.027	0.682214			100.251	0.687811			28.282	0.0645974			43.237	0.129397				97.159	6.40323
																	106.027	0.682214			100.251	0.687811			28.495	0.0645974			43.517	0.13425				97.214	6.43065
																	106.027	0.682214			100.265	0.687811			28.694	0.0645974			43.811	0.13425				97.226	6.45161
																	106.027	0.682214			100.278	0.687811			28.868	0.0645974			44.05	0.13425				97.24	6.48387
																	106.014	0.682214			100.265	0.687811			29.068	0.0694422			44.357	0.13425				97.226	6.51129
																	106.04	0.682214			100.265	0.687811			29.202	0.0694422			44.691	0.14072				97.226	6.53226
																	106.028	0.682214			100.265	0.687811			29.362	0.0694422			44.972	0.14072				97.239	6.56452
																	106.014	0.682214			100.265	0.687811			29.549	0.0694422			45.331	0.14072				97.293	6.59194
																	106.027	0.682214			100.265	0.687811			29.749	0.0759019			45.638	0.14072				97.347	6.6129
																	106.04	0.682214			100.251	0.687811			29.871	0.0759019			46.065	0.14072				97.387	6.64516
																	106.027	0.682214			100.251	0.687811			30.031	0.0759019			46.452	0.14072				97.426	6.67742
																	106.027	0.682214			100.265	0.687811			30.19	0.0759019			46.893	0.145572				97.454	6.69355
																	106.027	0.688665			100.278	0.687811			30.363	0.0759019			47.293	0.145572				97.48	6.72581
																	106.028	0.688665			100.278	0.687811			30.589	0.0759019			47.667	0.145572				97.506	6.75806
																	106.04	0.688665			100.265	0.687811			30.764	0.0759019			48.079	0.145572				97.546	6.77903
																	106.04	0.688665			100.265	0.687811			30.95	0.0759019			48.466	0.145572				97.586	6.80645
																	106.04	0.688665			100.278	0.687811			31.136	0.0759019			48.907	0.145572				97.625	6.83871
																	106.054	0.688665			100.265	0.687811			31.323	0.0759019			49.267	0.150425				97.667	6.85484
																	106.04	0.693504			100.278	0.687811			31.536	0.0759019			49.641	0.150425				97.734	6.8871
																	106.067	0.693504			100.265	0.687811			31.776	0.0759019			50.015	0.150425				97.799	6.91935
																	106.08	0.693504			100.265	0.687811			31.989	0.0759019			50.441	0.150425				97.866	6.93548
																	106.067	0.693504			100.265	0.687811			32.216	0.0759019			50.856	0.156894				97.933	6.96774
																	106.04	0.693504			100.251	0.687811			32.443	0.0759019			50.855	0.156894				98.001	6.99516
																	106.04	0.693504			100.251	0.687811			32.671	0.0807467			50.63	0.156894				98.041	7.01613
																	106.04	0.693504			100.251	0.687811			32.899	0.0807467			50.47	0.156894				98.053	7.04839
																	106.067	0.693504			100.278	0.687811			33.125	0.0807467			50.323	0.156894				98.041	7.08065
																	106.067	0.693504			100.265	0.687811			33.338	0.0807467			50.203	0.156894				98.001	7.09677
																	106.067	0.693504			100.265	0.687811			33.551	0.0855916			50.177	0.156894				97.947	7.12903
																	106.04	0.693504			100.265	0.687811			33.766	0.0855916			50.817	0.156894				97.934	7.15645
																	106.054	0.693504			100.278	0.687811			33.926	0.0920513			51.364	0.156894				97.975	7.17742
																	106.054	0.693504			100.251	0.687811			34.112	0.0920513			51.858	0.156894				98.042	7.20968
																	106.04	0.693504			100.265	0.692643			34.299	0.0920513			52.097	0.161747				98.108	7.2371
																	106.027	0.693504			100.251	0.692643			34.459	0.0920513			51.924	0.161747				98.135	7.25806
																	106.014	0.693504			100.265	0.692643			34.674	0.0920513			51.791	0.161747				98.175	7.29032
																	106.014	0.693504			100.251	0.692643			34.887	0.0920513			51.629	0.161747				98.214	7.32258
																	106.014	0.693504			100.251	0.692643			35.101	0.0920513			51.537	0.161747				98.24	7.33871
																	106	0.693504			100.238	0.692643			35.288	0.0920513			51.458	0.161747				98.254	7.37097
																	105.987	0.693504			100.238	0.692643			35.514	0.0920513			51.377	0.161747				98.307	7.39839
																	105.987	0.693504			100.265	0.692643			35.727	0.0920513			51.31	0.161747				98.335	7.42419
																	106	0.693504			100.251	0.692643			35.928	0.0920513			51.604	0.161747				98.361	7.45161
																	106	0.693504			100.251	0.692643			36.142	0.0920513			52.377	0.161747				98.362	7.47258
																	106.014	0.693504			100.251	0.692643			36.342	0.0920513			53.045	0.161747				98.375	7.50484
																	106	0.693504			100.265	0.692643			36.595	0.0920513			53.593	0.161747				98.361	7.53226
																	106	0.693504			100.265	0.692643			36.782	0.0920513			54.22	0.166599				98.321	7.55323
																	106.014	0.693504			100.238	0.692643			37.049	0.0968961			54.14	0.166599				98.267	7.58548
																	106.04	0.693504			100.238	0.692643			37.302	0.0968961			53.981	0.166599				98.281	7.6129
																	106.054	0.693504			100.238	0.692643			37.529	0.0968961			53.833	0.166599				98.282	7.64032
																	106.027	0.693504			100.238	0.692643			37.756	0.101741			53.727	0.166599				98.307	7.66613
																	106.027	0.693504			100.251	0.692643			37.968	0.101741			53.646	0.166599				98.334	7.69355
																	106.04	0.693504			100.265	0.692643			38.17	0.108201			53.552	0.166599				98.387	7.72097
																	106.054	0.693504			100.251	0.692643			38.063	0.108201			53.5	0.166599				98.426	7.74677
																	106.054	0.693504			100.251	0.692643			37.943	0.108201			54.313	0.166599				98.466	7.77419
																	106.04	0.693504			100.238	0.697476			37.836	0.108201			55.06	0.166599				98.506	7.80161
																	106.04	0.693504			100.251	0.697476			37.769	0.108201			55.701	0.166599				98.561	7.82742
																	106.027	0.693504			100.251	0.697476			37.73	0.108201			56.341	0.166599				98.601	7.85
																	106.04	0.693504			100.238	0.697476			37.676	0.108201			56.861	0.173069				98.641	7.88226
																	106.04	0.693504			100.251	0.697476			37.664	0.108201			56.674	0.173069				98.667	7.90806
																	106.04	0.693504			100.238	0.697476			37.65	0.108201			56.515	0.173069				98.68	7.93065
																	106.04	0.693504			100.251	0.697476			37.651	0.108201			56.409	0.173069				98.734	7.95645
																	106.04	0.693504			100.251	0.703919			37.651	0.108201			56.289	0.173069				98.761	7.98387
																	106.04	0.693504			100.225	0.703919			37.665	0.108201			56.196	0.173069				98.834	8.01129
																	106.054	0.693504			100.225	0.703919			37.691	0.108201			56.115	0.173069				98.841	8.0371
																	106.027	0.693504			100.238	0.703919			37.718	0.108201			56.383	0.173069				98.76	8.09194
																	106.014	0.693504			100.225	0.703919			37.731	0.108201			57.29	0.173069				96.932	8.09194
																	106.014	0.693504			100.211	0.703919			37.786	0.108201			58.106	0.177922				96.827	8.09194
																	106.04	0.693504			100.211	0.703919			37.919	0.108201			58.265	0.177922				96.639	8.09194
																	106.067	0.693504			100.211	0.703919			38.039	0.108201			58.119	0.177922				96.468	8.09677
																	106.067	0.693504			100.225	0.703919			38.119	0.108201			57.972	0.177922				96.333	8.09677
																	106.054	0.693504			100.211	0.703919			38.239	0.108201			57.893	0.177922				96.225	8.09677
																	106.04	0.693504			100.238	0.703919			38.359	0.108201			57.814	0.182774				96.119	8.09677
																	106.054	0.693504			100.238	0.703919			38.452	0.108201			57.746	0.177922				96.051	8.09677
																	106.067	0.693504			100.251	0.703919			38.573	0.108201			57.667	0.182774				95.972	8.09677
																	106.067	0.693504			100.238	0.703919			38.693	0.108201			57.601	0.182774				95.89	8.09677
																	106.027	0.693504			100.225	0.703919			38.814	0.108201			57.521	0.182774				95.841	8.10161
																	106.027	0.693504			100.238	0.703919			38.946	0.108201			57.495	0.182774				95.209	8.10161
																	106.04	0.693504			100.238	0.703919			39.067	0.108201			57.443	0.182774				95.215	8.10161
																	106.067	0.693504			100.238	0.703919			39.174	0.108201			57.389	0.182774				95.197	8.10161
																	106.054	0.693504			100.238	0.703919			39.32	0.108201			57.35	0.182774				95.184	8.10161
																	106.04	0.693504			100.251	0.703919			39.441	0.108201			57.296	0.182774				95.171	8.10161
																	106.027	0.693504			100.265	0.703919			39.627	0.108201			57.256	0.182774				95.148	8.10161
																	106.027	0.693504			100.265	0.703919			39.841	0.108201			57.216	0.182774				95.16	8.10161
																	106.067	0.693504			100.265	0.703919			40.014	0.108201			57.177	0.182774				95.147	8.10161
																	106.08	0.693504			100.238	0.703919			40.214	0.108201			57.151	0.182774				95.135	8.10161
																	106.054	0.693504			100.265	0.703919			40.414	0.108201			57.111	0.182774				95.131	8.10161
																	106.04	0.693504			100.251	0.703919			40.601	0.108201			57.085	0.182774				95.117	8.10161
																	106.027	0.693504			100.265	0.703919			40.801	0.108201			57.857	0.182774				95.118	8.10161
																	106.027	0.693504			100.265	0.703919			41.028	0.108201			58.818	0.182774				95.092	8.10161
																	106.04	0.693504			100.251	0.708751			41.215	0.11789			59.686	0.182774				95.078	8.10806
																	106.027	0.693504			100.251	0.708751			41.308	0.11789			60.471	0.182774				95.078	8.10806
																	106.014	0.693504			100.251	0.708751			41.427	0.11789			61.245	0.182774				95.067	8.10806
																	106	0.698342			100.265	0.708751			41.575	0.11789			61.926	0.182774				95.051	8.10806
																	106.014	0.698342			100.265	0.708751			41.708	0.12435			62.499	0.189244				95.052	8.10806
																	106	0.698342			100.251	0.708751			41.815	0.12435			62.366	0.189244				95.038	8.10806
																	106	0.698342			100.251	0.708751			41.936	0.12435			62.178	0.189244				95.04	8.10806
																	105.987	0.698342			100.251	0.708751			42.042	0.12435			62.071	0.189244				95.039	8.10806
																	105.987	0.698342			100.278	0.708751			42.163	0.12435			61.963	0.189244				95.023	8.10806
																	105.987	0.698342			100.251	0.708751			42.337	0.12435			61.897	0.189244				95.014	8.10806
																	105.987	0.698342			100.238	0.708751			42.444	0.12435			62.726	0.189244				95	8.10806
																	105.974	0.698342			100.238	0.708751			42.589	0.12435			63.658	0.189244				94.973	8.10806
																	105.96	0.704793			100.225	0.708751			42.736	0.12435			64.381	0.194096				94.956	8.10806
																	105.96	0.704793			100.251	0.708751			42.869	0.12435			64.354	0.198949				94.927	8.10806
																	105.96	0.704793			100.238	0.708751			43.003	0.12435			64.181	0.198949				94.917	8.10806
																	105.974	0.704793			100.238	0.708751			43.191	0.12435			64.034	0.198949				94.889	8.10806
																	105.974	0.704793			100.225	0.708751			43.324	0.12435			63.955	0.198949				94.862	8.10806
																	105.974	0.704793			100.238	0.708751			43.497	0.12435			63.888	0.198949
																	105.974	0.704793			100.238	0.708751			43.657	0.12435			63.822	0.198949
																	106.014	0.704793			100.291	0.708751			43.819	0.12435			63.742	0.198949
																	106	0.704793			100.278	0.708751			43.965	0.12435			63.677	0.198949
																	106	0.704793			100.278	0.708751			44.152	0.12435			63.637	0.198949
																	105.974	0.709632			100.278	0.713584			44.38	0.12435			63.583	0.198949
																	105.987	0.709632			100.278	0.713584			44.606	0.12435			63.53	0.198949
																	106	0.709632			100.291	0.713584			44.847	0.12435			63.49	0.198949
																	106.014	0.709632			100.265	0.713584			45.046	0.12435			63.437	0.198949
																	106.027	0.709632			100.278	0.720027			45.287	0.129195			63.397	0.198949
																	106.014	0.709632			100.251	0.720027			45.434	0.13404			63.357	0.198949
																	106	0.709632			100.251	0.720027			45.582	0.13404			63.317	0.198949
																	106.014	0.709632			100.251	0.720027			45.715	0.13404			63.29	0.198949
																	106.014	0.709632			100.225	0.720027			45.836	0.140499			63.238	0.198949
																	106.014	0.709632			100.238	0.720027			45.956	0.140499			63.198	0.198949
																	106	0.709632			100.238	0.720027			46.089	0.140499			63.278	0.198949
																	105.987	0.709632			100.251	0.720027			46.249	0.140499			64.493	0.198949
																	105.987	0.709632			100.265	0.720027			46.383	0.140499			65.506	0.198949
																	106.014	0.709632			100.251	0.720027			46.528	0.140499			66.412	0.198949
																	106.027	0.709632			100.251	0.720027			46.688	0.140499			67.279	0.198949
																	106.014	0.709632			100.238	0.720027			46.823	0.140499			68.066	0.205419
																	106.014	0.709632			100.238	0.720027			46.983	0.140499			67.974	0.205419
																	106.014	0.709632			100.251	0.720027			47.143	0.140499			67.814	0.205419
																	106.014	0.709632			100.238	0.720027			47.29	0.140499			67.707	0.205419
																	106.027	0.709632			100.251	0.720027			47.477	0.140499			67.588	0.205419
																	106.027	0.709632			100.265	0.720027			47.65	0.140499			67.521	0.205419
																	106.027	0.709632			100.238	0.720027			47.824	0.140499			67.469	0.205419
																	106.04	0.709632			100.251	0.720027			48.01	0.140499			67.976	0.205419
																	106.04	0.709632			100.238	0.720027			48.17	0.140499			69.096	0.210271
																	106.027	0.709632			100.225	0.720027			48.357	0.140499			69.311	0.215123
																	106.027	0.709632			100.225	0.720027			48.53	0.140499			69.164	0.215123
																	106.027	0.709632			100.251	0.720027			48.691	0.140499			69.07	0.215123
																	106.027	0.709632			100.238	0.720027			48.878	0.145344			68.951	0.215123
																	106.04	0.709632			100.225	0.724859			49.024	0.145344			68.871	0.215123
																	106.04	0.709632			100.238	0.724859			49.21	0.145344			68.804	0.215123
																	106.04	0.709632			100.238	0.724859			49.437	0.150189			68.738	0.215123
																	106.04	0.709632			100.225	0.724859			49.517	0.150189			68.685	0.215123
																	106.04	0.709632			100.238	0.724859			49.397	0.150189			68.646	0.215123
																	106.054	0.709632			100.225	0.724859			49.306	0.156649			68.606	0.215123
																	106.04	0.709632			100.211	0.724859			49.211	0.156649			68.567	0.215123
																	106.027	0.709632			100.225	0.724859			49.12	0.156649			68.512	0.215123
																	106	0.709632			100.211	0.724859			49.053	0.156649			68.473	0.215123
																	106	0.709632			100.225	0.724859			49.013	0.156649			68.433	0.215123
																	106.014	0.709632			100.225	0.724859			48.945	0.156649			68.406	0.215123
																	106.014	0.709632			100.225	0.724859			48.88	0.156649			68.366	0.215123
																	106.027	0.709632			100.211	0.724859			48.853	0.156649			68.326	0.215123
																	106.014	0.709632			100.198	0.724859			48.799	0.156649			68.287	0.215123
																	106	0.709632			100.211	0.724859			48.759	0.156649			68.261	0.215123
																	106	0.709632			100.211	0.724859			48.721	0.156649			68.234	0.215123
																	106	0.709632			100.211	0.724859			48.653	0.156649			68.207	0.215123
																	106	0.709632			100.225	0.724859			48.613	0.156649			68.207	0.215123
																	106	0.709632			100.225	0.724859			48.573	0.156649			68.342	0.215123
																	106	0.709632			100.225	0.724859			48.534	0.156649			68.462	0.215123
																	106	0.709632			100.238	0.724859			48.508	0.156649			68.594	0.215123
																	106.014	0.709632			100.225	0.724859			48.481	0.156649			68.729	0.215123
																	106.014	0.709632			100.225	0.724859			48.454	0.156649			68.849	0.215123
																	106.014	0.709632			100.211	0.724859			48.402	0.156649			68.983	0.215123
																	105.987	0.709632			100.211	0.724859			48.387	0.156649			69.13	0.215123
																	105.987	0.709632			100.225	0.729692			48.402	0.156649			69.25	0.215123
																	105.987	0.709632			100.198	0.729692			48.774	0.156649			69.423	0.215123
																	106	0.709632			100.211	0.729692			49.109	0.156649			69.53	0.215123
																	105.987	0.709632			100.211	0.729692			49.414	0.156649			69.664	0.215123
																	105.987	0.709632			100.185	0.729692			49.694	0.156649			69.797	0.215123
																	106	0.709632			100.225	0.736135			50.003	0.156649			69.943	0.215123
																	106.014	0.709632			100.225	0.736135			50.321	0.156649			70.091	0.215123
																	106.014	0.709632			100.211	0.736135			50.629	0.156649			70.291	0.215123
																	106.014	0.709632			100.198	0.736135			50.963	0.156649			70.518	0.215123
																	106	0.709632			100.211	0.736135			51.229	0.156649			70.745	0.215123
																	106	0.709632			100.225	0.736135			51.523	0.156649			70.971	0.215123
																	106	0.709632			100.225	0.736135			51.79	0.156649			71.184	0.215123
																	106.014	0.709632			100.198	0.736135			52.069	0.156649			71.425	0.215123
																	106.014	0.709632			100.211	0.736135			52.375	0.156649			71.612	0.215123
																	106	0.709632			100.198	0.736135			52.656	0.156649			71.851	0.215123
																	106	0.709632			100.198	0.736135			52.949	0.156649			72.132	0.215123
																	106	0.709632			100.198	0.736135			53.242	0.161493			72.345	0.215123
																	106.014	0.709632			100.185	0.736135			53.469	0.166338			72.585	0.221593
																	106.014	0.709632			100.198	0.736135			53.442	0.166338			72.759	0.221593
																	105.987	0.709632			100.171	0.736135			53.31	0.166338			73.012	0.221593
																	105.974	0.709632			100.185	0.736135			53.203	0.166338			73.32	0.221593
																	105.974	0.709632			100.185	0.736135			53.11	0.166338			73.613	0.221593
																	105.987	0.709632			100.185	0.736135			53.043	0.172798			73.893	0.221593
																	105.988	0.709632			100.198	0.736135			52.95	0.172798			74.16	0.221593
																	105.96	0.709632			100.198	0.736135			52.883	0.172798			74.441	0.226446
																	105.96	0.709632			100.198	0.740967			52.83	0.172798			74.668	0.226446
																	105.96	0.709632			100.198	0.740967			52.791	0.172798			74.906	0.226446
																	105.96	0.709632			100.185	0.740967			52.711	0.172798			75.162	0.226446
																	105.974	0.709632			100.185	0.740967			52.684	0.172798			75.416	0.231298
																	105.96	0.71447			100.198	0.740967			52.618	0.172798			75.629	0.231298
																	105.947	0.71447			100.198	0.740967			52.577	0.172798			75.842	0.231298
																	105.96	0.71447			100.198	0.740967			52.538	0.172798			76.083	0.231298
																	105.974	0.71447			100.171	0.740967			52.512	0.172798			76.282	0.231298
																	106	0.71447			100.211	0.740967			52.473	0.172798			76.521	0.231298
																	105.987	0.720921			100.225	0.740967			52.446	0.172798			76.736	0.231298
																	105.987	0.720921			100.198	0.740967			52.419	0.172798			76.99	0.231298
																	105.974	0.720921			100.211	0.740967			52.379	0.172798			77.229	0.231298
																	106	0.720921			100.198	0.740967			52.339	0.172798			77.458	0.231298
																	106	0.720921			100.211	0.740967			52.313	0.172798			77.724	0.231298
																	106	0.720921			100.211	0.740967			52.299	0.172798			77.951	0.231298
																	106	0.720921			100.198	0.740967			52.259	0.172798			78.218	0.231298
																	106.014	0.720921			100.211	0.740967			52.232	0.172798			78.431	0.237768
																	106.027	0.720921			100.198	0.740967			52.218	0.172798			78.644	0.237768
																	106.027	0.720921			100.211	0.740967			52.194	0.172798			78.978	0.237768
																	106.027	0.720921			100.198	0.740967			52.166	0.172798			79.258	0.237768
																	106.014	0.720921			100.198	0.740967			52.286	0.172798			79.472	0.24262
																	106.014	0.720921			100.211	0.740967			52.82	0.172798			79.42	0.24262
																	106.027	0.720921			100.198	0.740967			53.26	0.172798			79.312	0.24262
																	106.04	0.720921			100.211	0.740967			53.674	0.172798			79.244	0.24262
																	106.027	0.720921			100.211	0.740967			54.087	0.172798			79.152	0.24262
																	106.014	0.720921			100.211	0.740967			54.421	0.172798			79.099	0.24262
																	106.027	0.720921			100.225	0.740967			54.755	0.172798			79.058	0.24262
																	106.04	0.720921			100.198	0.740967			55.114	0.172798			79.085	0.24262
																	106.04	0.720921			100.211	0.7458			55.408	0.172798			79.526	0.24262
																	106.04	0.72576			100.211	0.7458			55.768	0.172798			79.928	0.24262
																	106.054	0.72576			100.211	0.7458			56.088	0.172798			80.353	0.24262
																	106.054	0.72576			100.225	0.752243			56.394	0.172798			80.82	0.24262
																	106.054	0.72576			100.198	0.752243			56.741	0.172798			80.954	0.247473
																	106.08	0.72576			100.185	0.752243			57.022	0.172798			80.89	0.247473
																	106.08	0.72576			100.198	0.752243			57.276	0.177643			80.77	0.247473
																	106.054	0.72576			100.198	0.752243			57.248	0.182488			80.704	0.247473
																	106.054	0.72576			100.211	0.752243			57.208	0.182488			80.637	0.247473
																	106.067	0.72576			100.238	0.752243			57.102	0.188947			80.584	0.247473
																	106.08	0.72576			100.225	0.752243			56.981	0.188947			80.532	0.247473
																	106.094	0.72576			100.225	0.752243			56.928	0.188947			80.878	0.247473
																	106.08	0.72576			100.211	0.752243			56.861	0.188947			81.319	0.247473
																	106.08	0.72576			100.211	0.752243			56.794	0.188947			81.852	0.247473
																	106.08	0.72576			100.225	0.752243			56.756	0.188947			82.319	0.247473
																	106.08	0.72576			100.211	0.752243			56.704	0.188947			82.801	0.247473
																	106.094	0.72576			100.225	0.752243			56.651	0.188947			83.253	0.247473
																	106.067	0.72576			100.211	0.752243			56.597	0.188947			83.668	0.253943
																	106.067	0.72576			100.211	0.752243			56.557	0.188947			83.627	0.253943
																	106.08	0.72576			100.225	0.752243			56.518	0.188947			83.508	0.253943
																	106.094	0.72576			100.225	0.757075			56.477	0.188947			83.415	0.253943
																	106.094	0.72576			100.225	0.757075			56.452	0.188947			83.348	0.253943
																	106.08	0.72576			100.225	0.757075			56.412	0.188947			83.267	0.253943
																	106.067	0.72576			100.211	0.757075			56.373	0.188947			83.734	0.253943
																	106.067	0.72576			100.238	0.757075			56.346	0.188947			84.269	0.253943
																	106.08	0.72576			100.211	0.757075			56.319	0.188947			84.548	0.258795
																	106.08	0.72576			100.211	0.757075			56.293	0.188947			84.468	0.258795
																	106.08	0.72576			100.198	0.757075			56.267	0.188947			84.362	0.258795
																	106.054	0.72576			100.211	0.757075			56.24	0.188947			84.296	0.258795
																	106.054	0.72576			100.225	0.757075			56.2	0.188947			84.229	0.258795
																	106.067	0.72576			100.211	0.757075			56.174	0.188947			84.163	0.258795
																	106.067	0.72576			100.225	0.757075			56.147	0.188947			84.109	0.258795
																	106.094	0.72576			100.225	0.757075			56.135	0.188947			84.083	0.258795
																	106.08	0.72576			100.211	0.757075			56.093	0.188947			84.016	0.258795
																	106.08	0.72576			100.225	0.757075			56.094	0.188947			84.204	0.258795
																	106.094	0.72576			100.211	0.757075			56.054	0.188947			84.871	0.258795
																	106.094	0.72576			100.211	0.757075			56.136	0.188947			85.524	0.258795
																	106.094	0.72576			100.238	0.757075			56.629	0.188947			86.139	0.258795
																	106.08	0.72576			100.211	0.757075			57.136	0.188947			86.752	0.263647
																	106.08	0.72576			100.225	0.757075			57.602	0.188947			86.699	0.263647
																	106.094	0.72576			100.238	0.757075			58.031	0.188947			86.578	0.263647
																	106.08	0.72576			100.238	0.757075			58.415	0.188947			86.486	0.263647
																	106.08	0.72576			100.238	0.757075			58.75	0.188947			86.419	0.263647
																	106.067	0.72576			100.238	0.757075			59.097	0.188947			86.326	0.263647
																	106.067	0.72576			100.251	0.757075			59.469	0.188947			86.272	0.263647
																	106.08	0.72576			100.265	0.757075			59.816	0.188947			86.207	0.263647
																	106.094	0.72576			100.225	0.757075			60.163	0.188947			86.728	0.263647
																	106.08	0.72576			100.238	0.757075			60.511	0.188947			87.382	0.263647
																	106.054	0.72576			100.225	0.757075			60.884	0.193792			88.087	0.263647
																	106.027	0.72576			100.225	0.757075			61.004	0.193792			88.73	0.263647
																	106.04	0.72576			100.238	0.757075			60.897	0.198637			89.263	0.270117
																	106.08	0.72576			100.211	0.757075			60.764	0.205097			89.157	0.27497
																	106.067	0.72576			100.225	0.768351			60.684	0.205097			88.983	0.27497
																	106.08	0.72576			100.225	0.768351			60.604	0.205097			88.849	0.27497
																	106.067	0.72576			100.238	0.768351			60.537	0.205097			88.742	0.27497
																	106.067	0.72576			100.238	0.768351			60.458	0.205097			88.663	0.27497
																	106.08	0.72576			100.225	0.768351			60.39	0.205097			88.596	0.27497
																	106.08	0.72576			100.225	0.768351			60.337	0.205097			88.529	0.27497
																	106.067	0.72576			100.211	0.768351			60.298	0.205097			88.449	0.27497
																	106.054	0.72576			100.211	0.768351			60.245	0.205097			88.383	0.27497
																	106.054	0.72576			100.225	0.768351			60.218	0.205097			88.316	0.27497
																	106.067	0.72576			100.211	0.768351			60.191	0.205097			88.249	0.27497
																	106.067	0.72576			100.211	0.768351			60.125	0.205097			88.195	0.27497
																	106.067	0.72576			100.211	0.768351			60.086	0.205097			88.168	0.27497
																	106.054	0.72576			100.211	0.768351			60.072	0.205097			88.087	0.27497
																	106.067	0.72576			100.225	0.768351			60.045	0.205097			88.033	0.27497
																	106.08	0.72576			100.225	0.768351			60.019	0.205097			87.994	0.27497
																	106.067	0.72576			100.211	0.768351			60.007	0.205097			87.954	0.27497
																	106.054	0.72576			100.225	0.768351			59.98	0.205097			87.981	0.27497
																	106.04	0.72576			100.225	0.773183			59.953	0.205097			88.847	0.27497
																	106.054	0.72576			100.238	0.773183			59.926	0.205097			89.688	0.27497
																	106.067	0.72576			100.225	0.773183			59.901	0.205097			90.422	0.27497
																	106.08	0.72576			100.225	0.773183			59.873	0.205097			91.113	0.27497
																	106.067	0.72576			100.238	0.773183			59.86	0.205097			91.889	0.27497
																	106.054	0.72576			100.225	0.773183			59.833	0.205097			92.622	0.279822
																	106.04	0.72576			100.251	0.773183			59.807	0.205097			92.675	0.279822
																	106.054	0.72576			100.251	0.773183			59.808	0.205097			92.5	0.279822
																	106.067	0.72576			100.238	0.773183			59.794	0.205097			92.368	0.279822
																	106.067	0.72576			100.238	0.773183			59.769	0.205097			92.288	0.279822
																	106.067	0.72576			100.211	0.773183			59.754	0.205097			92.169	0.279822
																	106.04	0.72576			100.225	0.773183			59.741	0.205097			92.261	0.279822
																	106.067	0.72576			100.238	0.773183			59.756	0.205097			93.236	0.279822
																	106.067	0.72576			100.225	0.773183			59.835	0.205097			94.05	0.279822
																	106.054	0.72576			100.211	0.773183			59.929	0.205097			94.784	0.286292
																	106.067	0.72576			100.211	0.773183			60.022	0.205097			94.878	0.291144
																	106.067	0.72576			100.211	0.773183			60.116	0.205097			94.704	0.291144
																	106.054	0.72576			100.238	0.773183			60.196	0.205097			94.573	0.291144
																	106.054	0.72576			100.211	0.773183			60.331	0.205097			94.478	0.291144
																	106.054	0.72576			100.211	0.773183			60.384	0.205097			94.386	0.291144
																	106.054	0.72576			100.198	0.773183			60.49	0.205097			94.306	0.291144
																	106.054	0.72576			100.198	0.773183			60.57	0.205097			94.24	0.291144
																	106.054	0.72576			100.211	0.773183			60.663	0.205097			94.173	0.291144
																	106.054	0.72576			100.211	0.773183			60.758	0.205097			94.12	0.291144
																	106.067	0.72576			100.211	0.773183			60.85	0.205097			94.067	0.291144
																	106.067	0.72576			100.225	0.773183			60.943	0.205097			94.014	0.291144
																	106.014	0.72576			100.211	0.778016			61.05	0.205097			93.974	0.291144
																	106.014	0.72576			100.225	0.784459			61.13	0.205097			93.921	0.291144
																	106.027	0.72576			100.225	0.784459			61.223	0.205097			93.882	0.291144
																	106.014	0.72576			100.211	0.784459			61.317	0.205097			93.856	0.291144
																	106.027	0.72576			100.211	0.784459			61.437	0.205097			93.816	0.291144
																	106.014	0.72576			100.198	0.784459			61.544	0.205097			93.75	0.291144
																	106.014	0.72576			100.225	0.784459			61.69	0.205097			93.698	0.291144
																	106.027	0.72576			100.225	0.784459			61.877	0.205097			93.672	0.291144
																	106.014	0.72576			100.211	0.784459			62.05	0.205097			94.325	0.291144
																	106.014	0.730598			100.198	0.784459			62.21	0.205097			95.328	0.291144
																	106.014	0.730598			100.185	0.789291			62.384	0.205097			96.275	0.291144
																	106.027	0.730598			100.211	0.789291			62.557	0.205097			97.008	0.291144
																	106.054	0.730598			100.198	0.789291			62.704	0.205097			97.756	0.291144
																	106.04	0.730598			100.198	0.789291			62.877	0.205097			98.33	0.295997
																	106.04	0.730598			100.185	0.789291			63.037	0.205097			98.357	0.295997
																	106.04	0.730598			100.185	0.789291			63.211	0.205097			98.183	0.295997
																	106.04	0.730598			100.211	0.789291			63.384	0.205097			98.09	0.295997
																	106.054	0.730598			100.211	0.789291			63.584	0.205097			98.024	0.295997
																	106.054	0.730598			100.198	0.789291			63.758	0.209942			97.944	0.295997
																	106.054	0.730598			100.198	0.789291			63.851	0.209942			97.89	0.295997
																	106.04	0.730598			100.198	0.789291			64.011	0.209942			98.757	0.295997
																	106.054	0.730598			100.211	0.789291			64.185	0.214786			99.691	0.295997
																	106.054	0.730598			100.211	0.789291			64.358	0.221246			100.051	0.302467
																	106.08	0.730598			100.211	0.789291			64.425	0.221246			99.931	0.302467
																	106.067	0.737049			100.211	0.789291			64.371	0.221246			99.811	0.307319
																	106.067	0.737049			100.198	0.789291			64.278	0.221246			99.731	0.307319
																	106.067	0.737049			100.211	0.789291			64.198	0.221246			99.65	0.307319
																	106.08	0.737049			100.198	0.789291			64.145	0.221246			99.571	0.307319
																	106.08	0.737049			100.185	0.794124			64.092	0.221246			99.516	0.307319
																	106.094	0.737049			100.198	0.794124			64.054	0.221246			99.476	0.307319
																	106.08	0.737049			100.185	0.800567			64	0.221246			99.437	0.307319
																	106.067	0.737049			100.198	0.800567			63.959	0.221246			99.37	0.307319
																	106.067	0.737049			100.225	0.800567			64.067	0.221246			99.568	0.307319
																	106.067	0.741888			100.211	0.800567			64.28	0.221246			99.784	0.307319
																	106.08	0.741888			100.211	0.800567			64.52	0.221246			99.758	0.307319
																	106.08	0.741888			100.198	0.800567			64.707	0.221246			99.717	0.307319
																	106.08	0.741888			100.185	0.805399			64.92	0.221246			99.651	0.307319
																	106.107	0.741888			100.211	0.805399			65.108	0.221246			99.598	0.307319
																	106.107	0.741888			100.198	0.805399			65.268	0.221246			99.57	0.307319
																	106.08	0.741888			100.185	0.805399			65.468	0.221246			99.531	0.307319
																	106.094	0.741888			100.198	0.805399			65.642	0.221246			99.491	0.307319
																	106.08	0.741888			100.185	0.805399			65.843	0.221246			99.438	0.307319
																	106.08	0.741888			100.211	0.805399			66.016	0.221246			99.506	0.307319
																	106.094	0.741888			100.185	0.805399			66.203	0.221246			100.639	0.307319
																	106.094	0.741888			100.185	0.805399			66.389	0.221246			101.626	0.307319
																	106.094	0.741888			100.171	0.805399			66.537	0.221246			102.467	0.307319
																	106.094	0.741888			100.171	0.805399			66.751	0.221246			103.267	0.307319
																	106.094	0.741888			100.185	0.805399			66.937	0.221246			104.082	0.307319
																	106.12	0.741888			100.185	0.805399			67.125	0.221246			104.428	0.312171
																	106.12	0.741888			100.185	0.805399			67.324	0.221246			104.267	0.312171
																	106.12	0.741888			100.185	0.805399			67.564	0.221246			104.108	0.318641
																	106.107	0.741888			100.185	0.810232			67.819	0.226091			104.002	0.318641
																	106.107	0.741888			100.185	0.810232			68.02	0.226091			103.923	0.318641
																	106.107	0.741888			100.185	0.810232			68.18	0.230936			103.857	0.318641
																	106.107	0.741888			100.171	0.816675			68.166	0.237395			103.803	0.318641
																	106.12	0.741888			100.185	0.816675			68.06	0.237395			103.749	0.318641
																	106.12	0.741888			100.185	0.816675			67.967	0.237395			103.697	0.318641
																	106.134	0.741888			100.185	0.821507			67.913	0.237395			103.644	0.318641
																	106.134	0.741888			100.198	0.821507			67.821	0.237395			103.617	0.318641
																	106.12	0.741888			100.185	0.821507			67.78	0.237395			103.55	0.318641
																	106.134	0.741888			100.198	0.821507			67.726	0.237395			103.51	0.318641
																	106.134	0.741888			100.185	0.821507			67.686	0.237395			103.483	0.318641
																	106.12	0.741888			100.185	0.821507			67.646	0.237395			103.43	0.318641
																	106.12	0.741888			100.198	0.821507			67.606	0.237395			103.39	0.318641
																	106.12	0.741888			100.198	0.821507			67.565	0.237395			103.363	0.318641
																	106.107	0.741888			100.198	0.821507			67.525	0.237395			103.764	0.318641
																	106.094	0.741888			100.198	0.821507			67.485	0.237395			104.937	0.318641
																	106.08	0.741888			100.171	0.821507			67.473	0.237395			105.844	0.323494
																	106.08	0.741888			100.198	0.821507			67.446	0.237395			105.938	0.323494
																	106.08	0.741888			100.185	0.82634			67.406	0.237395			105.804	0.323494
																	106.08	0.741888			100.185	0.82634			67.393	0.237395			105.699	0.323494
																	106.067	0.741888			100.171	0.82634			67.353	0.237395			105.631	0.323494
																	106.054	0.741888			100.185	0.82634			67.34	0.237395			105.539	0.323494
																	106.04	0.741888			100.198	0.832783			67.314	0.237395			105.485	0.323494
																	106.04	0.741888			100.185	0.837615			67.287	0.237395			105.432	0.323494
																	106.054	0.741888			100.171	0.837615			67.273	0.237395			105.366	0.323494
																	106.04	0.741888			100.171	0.837615			67.287	0.237395			105.34	0.323494
																	106.027	0.741888			100.171	0.837615			67.581	0.237395			106.38	0.323494
																	106.04	0.741888			100.185	0.837615			67.9	0.237395			107.42	0.323494
																	106.054	0.741888			100.171	0.837615			68.262	0.237395			108.274	0.323494
																	106.067	0.741888			100.171	0.837615			68.581	0.237395			109.088	0.323494
																	106.08	0.741888			100.158	0.837615			68.929	0.237395			109.955	0.328346
																	106.067	0.741888			100.145	0.837615			69.261	0.237395			109.861	0.334816
																	106.054	0.741888			100.171	0.837615			69.568	0.237395			109.715	0.334816
																	106.067	0.741888			100.171	0.842448			69.835	0.237395			109.595	0.334816
																	106.08	0.741888			100.158	0.842448			70.115	0.237395			109.488	0.334816
																	106.08	0.741888			100.158	0.842448			70.397	0.237395			109.421	0.334816
																	106.067	0.741888			100.158	0.853723			70.688	0.237395			109.369	0.334816
																	106.054	0.741888			100.145	0.853723			70.995	0.237395			109.291	0.334816
																	106.067	0.741888			100.158	0.853723			71.289	0.237395			109.249	0.334816
																	106.08	0.741888			100.131	0.853723			71.541	0.24224			109.182	0.334816
																	106.08	0.741888			100.131	0.853723			71.515	0.24224			109.155	0.339668
																	106.08	0.741888			100.131	0.853723			71.582	0.247085			109.102	0.334816
																	106.067	0.741888			100.145	0.853723			71.594	0.253545			109.061	0.339668
																	106.08	0.741888			100.145	0.853723			71.515	0.253545			109.009	0.339668
																	106.08	0.741888			100.131	0.853723			71.45	0.253545			108.982	0.339668
																	106.094	0.741888			100.145	0.858556			71.37	0.253545			108.956	0.339668
																	106.107	0.741888			100.118	0.858556			71.289	0.253545			108.929	0.339668
																	106.08	0.741888			100.131	0.858556			71.236	0.253545			108.875	0.334816
																	106.094	0.741888			100.145	0.864999			71.197	0.253545			108.891	0.334816
																	106.094	0.741888			100.118	0.869831			71.157	0.253545			110.01	0.339668
																	106.08	0.741888			100.131	0.869831			71.104	0.253545			110.145	0.339668
																	106.08	0.741888			100.118	0.869831			71.077	0.253545			110.091	0.339668
																	106.08	0.741888			100.131	0.869831			71.037	0.253545			109.984	0.339668
																	106.08	0.741888			100.145	0.869831			70.998	0.253545			109.919	0.339668
																	106.094	0.741888			100.145	0.869831			70.985	0.253545			109.866	0.339668
																	106.08	0.741888			100.145	0.869831			70.945	0.253545			109.827	0.339668
																	106.08	0.741888			100.131	0.874664			70.919	0.253545			109.762	0.339668
																	106.067	0.741888			100.131	0.874664			70.891	0.253545			109.682	0.339668
																	106.067	0.741888			100.158	0.881107			70.878	0.253545			109.656	0.339668
																	106.067	0.741888			100.145	0.885939			70.852	0.253545			109.617	0.339668
																	106.067	0.741888			100.145	0.885939			70.826	0.253545			110.217	0.339668
																	106.067	0.741888			100.145	0.885939			70.799	0.253545			111.416	0.339668
																	106.04	0.746726			100.145	0.885939			70.786	0.253545			112.365	0.339668
																	106.04	0.746726			100.158	0.885939			70.774	0.253545			113.246	0.339668
																	106.04	0.746726			100.131	0.885939			70.761	0.253545			114.339	0.339668
																	106.054	0.746726			100.131	0.890772			70.733	0.253545			114.992	0.350991
																	106.054	0.746726			100.131	0.890772			70.706	0.253545			114.899	0.350991
																	106.027	0.746726			100.131	0.897215			70.692	0.253545			114.738	0.350991
																	106.04	0.746726			100.145	0.902047			70.668	0.253545			114.618	0.350991
																	106.04	0.746726			100.131	0.902047			70.653	0.253545			114.525	0.350991
																	106.04	0.746726			100.131	0.902047			70.666	0.253545			114.444	0.350991
																	106.054	0.746726			100.131	0.902047			70.758	0.253545			114.365	0.350991
																	106.04	0.746726			100.105	0.902047			70.825	0.253545			114.285	0.350991
																	106.04	0.746726			100.105	0.902047			70.959	0.253545			114.233	0.350991
																	106.067	0.746726			100.118	0.90688			71.066	0.253545			114.192	0.350991
																	106.054	0.746726			100.105	0.913323			71.147	0.253545			114.141	0.350991
																	106.054	0.746726			100.131	0.918155			71.265	0.253545			114.085	0.350991
																	106.067	0.746726			100.131	0.918155			71.373	0.253545			114.058	0.350991
																	106.08	0.746726			100.145	0.918155			71.466	0.253545			114.006	0.350991
																	106.094	0.746726			100.171	0.918155			71.573	0.253545			113.966	0.350991
																	106.094	0.746726			100.158	0.918155			71.679	0.253545			113.938	0.350991
																	106.094	0.746726			100.185	0.922988			71.774	0.253545			113.899	0.350991
																	106.094	0.746726			100.185	0.929431			71.907	0.253545			113.874	0.350991
																	106.08	0.746726			100.185	0.929431			72.001	0.253545			114.114	0.350991
																	106.08	0.753177			100.211	0.934263			72.121	0.253545			114.873	0.355843
																	106.08	0.753177			100.185	0.934263			72.214	0.253545			114.862	0.355843
																	106.054	0.753177			100.171	0.934263			72.307	0.253545			114.835	0.355843
																	106.054	0.753177			100.145	0.939096			72.429	0.253545			114.768	0.355843
																	106.067	0.753177			100.158	0.945539			72.535	0.253545			114.687	0.355843
																	106.067	0.753177			100.158	0.945539			72.695	0.253545			114.636	0.355843
																	106.08	0.758016			100.131	0.945539			72.922	0.253545			114.596	0.355843
																	106.067	0.758016			100.131	0.950371			73.042	0.253545			114.541	0.355843
																	106.054	0.758016			100.118	0.950371			73.243	0.253545			114.514	0.355843
																	106.04	0.758016			100.118	0.955204			73.429	0.253545			114.475	0.355843
																	106.054	0.758016			100.131	0.961647			73.576	0.253545			114.595	0.355843
																	106.04	0.758016			100.118	0.961647			73.737	0.253545			115.835	0.355843
																	106.04	0.758016			100.105	0.961647			73.91	0.253545			116.947	0.355843
																	106.04	0.758016			100.105	0.966479			74.097	0.253545			117.918	0.355843
																	106.04	0.758016			100.091	0.971312			74.27	0.253545			118.837	0.355843
																	106.027	0.758016			100.091	0.977755			74.43	0.25839			119.438	0.367165
																	106.04	0.758016			100.091	0.977755			74.59	0.25839			119.303	0.367165
																	106.04	0.758016			100.078	0.977755			74.711	0.269694			119.143	0.367165
																	106.054	0.758016			100.078	0.982587			74.751	0.269694			119.023	0.367165
																	106.054	0.758016			100.065	0.98742			74.698	0.269694			118.942	0.367165
																	106.04	0.758016			100.065	0.993863			74.617	0.269694			118.864	0.367165
																	106.04	0.758016			100.065	0.993863			74.564	0.269694			118.811	0.367165
																	106.027	0.758016			100.038	0.993863			74.511	0.269694			118.758	0.367165
																	106.014	0.758016			100.038	0.998695			74.458	0.269694			118.704	0.367165
																	106.014	0.758016			100.038	1.00997			74.417	0.269694			118.651	0.367165
																	106.027	0.758016			100.038	1.00997			74.391	0.269694			118.598	0.367165
																	106.027	0.758016			100.038	1.00997			74.337	0.269694			118.559	0.367165
																	106.027	0.758016			100.025	1.0148			74.297	0.269694			118.519	0.367165
																	106.027	0.758016			100.025	1.02608			74.27	0.269694			118.493	0.367165
																	106.027	0.758016			99.998	1.02608			74.23	0.269694			118.438	0.367165
																	106.014	0.758016			99.998	1.02608			74.189	0.269694			118.385	0.367165
																	106.027	0.758016			100.011	1.03091			74.178	0.269694			118.345	0.367165
																	106.04	0.758016			100.011	1.04219			74.231	0.269694			118.306	0.367165
																	106.04	0.758016			99.998	1.04219			74.362	0.269694			118.294	0.367165
																	106.04	0.758016			99.985	1.04219			74.55	0.269694			118.399	0.367165
																	106.014	0.758016			99.971	1.05829			74.816	0.269694			118.572	0.367165
																	106.027	0.758016			99.971	1.05829			75.045	0.269694			118.747	0.367165
																	106.027	0.758016			99.971	1.05829			75.245	0.269694			118.92	0.367165
																	106.027	0.758016			99.958	1.0744			75.445	0.269694			119.066	0.372018
																	106.04	0.758016			99.945	1.0744			75.673	0.269694			119.161	0.372018
																	106.027	0.758016			99.931	1.0744			75.873	0.269694			119.175	0.372018
																	106.04	0.758016			99.931	1.09051			76.059	0.269694			119.202	0.372018
																	106.04	0.758016			99.905	1.09051			76.287	0.269694			119.188	0.372018
																	106.04	0.758016			99.905	1.10662			76.461	0.269694			119.122	0.372018
																	106.04	0.758016			99.878	1.10662			76.634	0.269694			119.07	0.372018
																	106.027	0.758016			99.865	1.10662			76.847	0.269694			119.044	0.372018
																	106.054	0.758016			99.865	1.12273			77.021	0.269694			119.27	0.372018
																	106.054	0.758016			99.851	1.12273			77.249	0.269694			119.538	0.372018
																	106.067	0.758016			99.838	1.13883			77.436	0.269694			119.792	0.372018
																	106.054	0.758016			99.825	1.13883			77.675	0.269694			120.018	0.372018
																	106.054	0.758016			99.798	1.15494			77.955	0.269694			120.232	0.372018
																	106.054	0.758016			99.798	1.15494			78.209	0.274539			120.46	0.372018
																	106.054	0.758016			99.785	1.17105			78.317	0.285843			120.7	0.372018
																	106.067	0.758016			99.745	1.18072			78.264	0.285843			120.926	0.372018
																	106.067	0.758016			99.718	1.18716			78.171	0.285843			121.167	0.372018
																	106.067	0.758016			99.678	1.19682			78.079	0.285843			121.353	0.372018
																	106.054	0.758016			99.665	1.21293			77.997	0.285843			121.592	0.372018
																	106.054	0.758016			99.625	1.21937			77.957	0.285843			121.833	0.372018
																	106.054	0.758016			99.584	1.22904			77.917	0.285843			122.178	0.372018
																	106.054	0.758016			99.544	1.24515			77.851	0.285843			122.499	0.37687
																	106.04	0.758016			99.464	1.26126			77.812	0.285843			122.739	0.37687
																	106.027	0.758016			99.451	1.27736			77.785	0.285843			123.006	0.37687
																	106.054	0.758016			99.411	1.29347			77.758	0.285843			123.3	0.37687
																	106.067	0.758016			99.304	1.30958			77.731	0.285843			123.552	0.37687
																	106.067	0.758016			99.238	1.32569			77.691	0.285843			123.793	0.38334
																	106.067	0.758016			99.091	1.35307			77.665	0.285843			123.766	0.38334
																	106.054	0.758016			98.958	1.37401			77.625	0.285843			123.673	0.38334
																	106.067	0.758016			98.691	1.40623			77.596	0.285843			123.58	0.38334
																	106.067	0.758016			98.237	1.44489			77.57	0.285843			123.5	0.38334
																	106.067	0.758016			97.464	1.49804			77.544	0.285843			123.646	0.38334
																	106.054	0.758016			94.369	1.59469			77.518	0.285843			123.969	0.38334
																	106.04	0.758016			92.609	1.7445			77.504	0.285843			124.288	0.38334
																	106.04	0.762854			90.581	1.93296			77.478	0.285843			124.568	0.388192
																	106.054	0.762854			87.22	2.17941			77.452	0.285843			124.633	0.388192
																	106.054	0.762854			80.471	2.566			77.437	0.285843			124.554	0.388192
																	106.04	0.762854			75.069	3.06052			77.412	0.285843			124.501	0.388192
																	106.027	0.762854			71.214	3.69356			77.397	0.285843			124.408	0.388192
																	106.027	0.762854			68.706	4.14459			77.665	0.285843			124.354	0.388192
																	106.027	0.762854			66.772	4.62782			78.037	0.285843			124.314	0.388192
																	106.027	0.762854			64.585	4.97254			78.438	0.285843			124.262	0.388192
																	106.027	0.762854			59.824	5.26731			78.8	0.285843			124.234	0.388192
																	106.014	0.762854			52.34	5.61686			79.187	0.285843			124.568	0.388192
																	106.014	0.762854			51.846	5.92291			79.494	0.285843			125.063	0.388192
																	106.04	0.762854			50.793	5.92774			79.788	0.285843			125.45	0.388192
																	106.04	0.762854							80.081	0.285843			125.85	0.388192
																	106.027	0.762854							80.401	0.285843			126.224	0.388192
																	106.027	0.762854							80.681	0.285843			126.544	0.388192
																	106.027	0.762854							80.962	0.285843			126.904	0.388192
																	106.04	0.762854							81.268	0.285843			127.157	0.393045
																	106.027	0.762854							81.563	0.285843			127.117	0.393045
																	106.027	0.762854							81.722	0.301993			127.024	0.393045
																	106.027	0.762854							81.642	0.301993			126.931	0.393045
																	106.027	0.762854							81.535	0.301993			126.905	0.393045
																	106.014	0.762854							81.456	0.301993			127.386	0.393045
																	106.054	0.762854							81.389	0.301993			127.852	0.399515
																	106.067	0.762854							81.336	0.301993			127.919	0.399515
																	106.067	0.762854							81.284	0.301993			127.839	0.399515
																	106.067	0.762854							81.243	0.301993			127.745	0.399515
																	106.094	0.762854							81.204	0.301993			127.666	0.399515
																	106.094	0.762854							81.15	0.301993			127.613	0.399515
																	106.08	0.762854							81.138	0.301993			127.546	0.399515
																	106.067	0.762854							81.085	0.301993			127.506	0.399515
																	106.054	0.762854							81.058	0.301993			127.452	0.399515
																	106.067	0.769305							81.018	0.301993			127.414	0.399515
																	106.067	0.769305							80.979	0.301993			127.866	0.399515
																	106.067	0.769305							80.952	0.301993			128.468	0.399515
																	106.08	0.769305							80.924	0.301993			129.042	0.399515
																	106.067	0.769305							80.884	0.301993			129.576	0.404367
																	106.067	0.769305							80.857	0.301993			129.721	0.404367
																	106.067	0.769305							80.831	0.301993			129.615	0.404367
																	106.067	0.769305							80.805	0.301993			129.508	0.404367
																	106.067	0.769305							80.779	0.301993			129.427	0.404367
																	106.067	0.769305							80.738	0.301993			129.321	0.404367
																	106.067	0.769305							80.725	0.301993			129.268	0.404367
																	106.08	0.769305							80.685	0.301993			129.228	0.404367
																	106.094	0.769305							80.671	0.301993			129.521	0.404367
																	106.08	0.769305							80.671	0.301993			130.098	0.404367
																	106.054	0.774144							80.645	0.301993			130.776	0.404367
																	106.067	0.774144							80.631	0.301993			131.336	0.404367
																	106.067	0.774144							80.603	0.301993			131.682	0.40922
																	106.067	0.774144							80.592	0.301993			131.563	0.40922
																	106.08	0.774144							80.726	0.301993			131.444	0.40922
																	106.067	0.774144							81.206	0.301993			131.337	0.40922
																	106.067	0.774144							81.619	0.301993			131.284	0.40922
																	106.094	0.774144							82.045	0.301993			131.231	0.40922
																	106.107	0.774144							82.417	0.301993			131.164	0.40922
																	106.107	0.774144							82.738	0.301993			131.111	0.40922
																	106.094	0.774144							83.071	0.301993			131.616	0.40922
																	106.094	0.774144							83.391	0.301993			132.365	0.40922
																	106.107	0.774144							83.725	0.301993			133.072	0.40922
																	106.107	0.774144							84.005	0.301993			133.74	0.40922
																	106.107	0.774144							84.338	0.301993			134.313	0.415689
																	106.107	0.774144							84.632	0.306838			134.366	0.420542
																	106.094	0.774144							84.632	0.306838			134.22	0.420542
																	106.094	0.774144							84.526	0.318142			134.099	0.420542
																	106.107	0.774144							84.433	0.318142			133.993	0.420542
																	106.107	0.774144							84.339	0.318142			133.926	0.420542
																	106.107	0.774144							84.286	0.318142			133.834	0.420542
																	106.107	0.774144							84.219	0.318142			133.779	0.420542
																	106.107	0.774144							84.18	0.318142			133.727	0.420542
																	106.107	0.774144							84.126	0.318142			133.675	0.420542
																	106.12	0.774144							84.072	0.318142			133.607	0.420542
																	106.12	0.774144							84.032	0.318142			133.554	0.420542
																	106.107	0.774144							83.98	0.318142			133.529	0.420542
																	106.107	0.774144							83.94	0.318142			133.475	0.420542
																	106.094	0.774144							83.914	0.318142			133.421	0.420542
																	106.094	0.774144							83.874	0.318142			133.397	0.420542
																	106.094	0.774144							83.848	0.318142			133.371	0.420542
																	106.054	0.774144							83.82	0.318142			133.315	0.420542
																	106.067	0.774144							83.78	0.318142			133.289	0.420542
																	106.08	0.774144							83.754	0.318142			133.863	0.420542
																	106.067	0.774144							83.742	0.318142			134.745	0.420542
																	106.067	0.774144							83.713	0.318142			135.452	0.425394
																	106.067	0.774144							83.687	0.318142			135.424	0.425394
																	106.067	0.774144							83.673	0.318142			135.318	0.425394
																	106.094	0.774144							83.647	0.318142			135.212	0.425394
																	106.094	0.774144							83.607	0.318142			135.131	0.425394
																	106.094	0.774144							83.58	0.318142			135.078	0.425394
																	106.08	0.774144							83.58	0.318142			134.998	0.425394
																	106.094	0.774144							83.553	0.318142			134.946	0.425394
																	106.094	0.774144							83.54	0.318142			134.907	0.425394
																	106.094	0.774144							83.528	0.318142			135.226	0.425394
																	106.08	0.774144							83.487	0.318142			136.257	0.425394
																	106.067	0.774144							83.475	0.318142			137.014	0.425394
																	106.067	0.774144							83.461	0.318142			137.788	0.425394
																	106.094	0.774144							83.461	0.318142			138.401	0.431864
																	106.094	0.774144							83.968	0.318142			138.308	0.431864
																	106.094	0.774144							84.475	0.318142			138.162	0.431864
																	106.08	0.774144							84.916	0.318142			138.028	0.431864
																	106.08	0.778982							85.289	0.318142			137.935	0.436717
																	106.094	0.778982							85.676	0.318142			137.868	0.436717
																	106.107	0.778982							86.009	0.318142			137.801	0.436717
																	106.12	0.778982							86.382	0.318142			137.734	0.436717
																	106.12	0.778982							86.755	0.318142			137.683	0.436717
																	106.134	0.778982							87.062	0.318142			137.642	0.436717
																	106.134	0.778982							87.238	0.322987			137.6	0.436717
																	106.134	0.778982							87.156	0.322987			137.548	0.436717
																	106.134	0.778982							87.051	0.322987			137.52	0.436717
																	106.12	0.778982							86.958	0.322987			137.481	0.436717
																	106.12	0.778982							86.89	0.327832			137.428	0.436717
																	106.134	0.778982							86.837	0.334292			137.402	0.436717
																	106.16	0.778982							86.783	0.334292			137.364	0.436717
																	106.174	0.778982							86.716	0.334292			137.336	0.436717
																	106.174	0.778982							86.663	0.334292			137.311	0.436717
																	106.147	0.778982							86.635	0.334292			137.816	0.436717
																	106.147	0.778982							86.61	0.327832			138.858	0.436717
																	106.147	0.778982							86.583	0.334292			139.285	0.441569
																	106.147	0.778982							86.556	0.334292			139.191	0.441569
																	106.147	0.778982							86.503	0.334292			139.085	0.441569
																	106.134	0.778982							86.476	0.334292			138.978	0.441569
																	106.134	0.778982							86.451	0.334292			138.939	0.441569
																	106.134	0.778982							86.438	0.334292			138.859	0.441569
																	106.12	0.778982							86.398	0.334292			138.806	0.441569
																	106.094	0.778982							86.372	0.334292			138.752	0.441569
																	106.094	0.778982							86.345	0.334292			138.698	0.441569
																	106.094	0.778982							86.319	0.334292			138.739	0.441569
																	106.107	0.778982							86.292	0.334292			139.885	0.441569
																	106.094	0.778982							86.279	0.334292			140.793	0.441569
																	106.107	0.778982							86.253	0.334292			141.646	0.441569
																	106.08	0.778982							86.226	0.334292			142.433	0.448039
																	106.094	0.778982							86.214	0.334292			142.366	0.448039
																	106.094	0.778982							86.174	0.334292			142.206	0.448039
																	106.067	0.778982							86.161	0.334292			142.099	0.448039
																	106.067	0.778982							86.134	0.334292			142.006	0.452891
																	106.08	0.778982							86.121	0.334292			141.913	0.448039
																	106.08	0.778982							86.108	0.334292			141.832	0.452891
																	106.094	0.785433							86.095	0.334292			141.78	0.452891
																	106.08	0.785433							86.081	0.334292			141.726	0.452891
																	106.08	0.785433							86.056	0.334292			141.688	0.452891
																	106.094	0.785433							86.056	0.334292			141.621	0.452891
																	106.094	0.785433							86.096	0.334292			141.567	0.452891
																	106.107	0.785433							86.177	0.334292			141.527	0.452891
																	106.107	0.785433							86.283	0.334292			141.475	0.452891
																	106.107	0.785433							86.363	0.334292			141.448	0.452891
																	106.094	0.785433							86.443	0.334292			141.395	0.452891
																	106.094	0.785433							86.55	0.334292			141.354	0.452891
																	106.107	0.785433							86.643	0.334292			141.329	0.452891
																	106.094	0.785433							86.764	0.334292			141.287	0.452891
																	106.095	0.785433							86.871	0.334292			141.674	0.452891
																	106.107	0.785433							86.965	0.334292			142.851	0.457744
																	106.107	0.785433							87.058	0.334292			142.956	0.457744
																	106.094	0.785433							87.137	0.334292			142.863	0.457744
																	106.094	0.785433							87.244	0.334292			142.782	0.457744
																	106.107	0.785433							87.35	0.334292			142.703	0.457744
																	106.12	0.785433							87.471	0.334292			142.623	0.457744
																	106.12	0.785433							87.578	0.334292			142.582	0.457744
																	106.12	0.785433							87.671	0.334292			142.542	0.457744
																	106.107	0.790272							87.765	0.334292			142.492	0.457744
																	106.107	0.790272							87.872	0.334292			142.463	0.457744
																	106.107	0.790272							88.018	0.334292			142.449	0.457744
																	106.107	0.790272							88.177	0.334292			143.597	0.457744
																	106.107	0.790272							88.379	0.334292			144.677	0.457744
																	106.107	0.790272							88.552	0.334292			145.584	0.457744
																	106.107	0.790272							88.712	0.334292			146.411	0.457744
																	106.12	0.790272							88.912	0.334292			147.265	0.464214
																	106.12	0.790272							89.072	0.334292			147.253	0.469066
																	106.12	0.790272							89.259	0.339136			147.053	0.469066
																	106.134	0.790272							89.393	0.339136			146.932	0.469066
																	106.134	0.790272							89.512	0.339136			146.798	0.473918
																	106.134	0.790272							89.659	0.339136			146.72	0.473918
																	106.16	0.790272							89.806	0.343981			146.626	0.473918
																	106.16	0.790272							89.887	0.343981			146.559	0.473918
																	106.16	0.790272							89.993	0.343981			146.505	0.473918
																	106.16	0.790272							90.101	0.350441			146.465	0.473918
																	106.147	0.790272							90.087	0.350441			146.411	0.473918
																	106.134	0.790272							90.032	0.350441			146.358	0.473918
																	106.134	0.790272							89.953	0.350441			146.319	0.473918
																	106.134	0.790272							89.9	0.350441			146.266	0.473918
																	106.134	0.790272							89.847	0.350441			146.227	0.473918
																	106.134	0.790272							89.807	0.350441			146.213	0.473918
																	106.134	0.790272							89.74	0.350441			146.174	0.473918
																	106.134	0.790272							89.713	0.350441			146.133	0.473918
																	106.134	0.790272							89.674	0.350441			146.107	0.473918
																	106.12	0.790272							89.634	0.350441			146.066	0.473918
																	106.107	0.790272							89.594	0.350441			146.04	0.473918
																	106.107	0.790272							89.608	0.350441			145.999	0.473918
																	106.12	0.790272							89.74	0.350441			145.959	0.473918
																	106.12	0.790272							89.941	0.350441			145.946	0.473918
																	106.107	0.790272							90.088	0.350441			145.919	0.473918
																	106.107	0.790272							90.274	0.350441			145.894	0.473918
																	106.094	0.790272							90.528	0.350441			145.867	0.473918
																	106.107	0.790272							90.728	0.350441			145.813	0.473918
																	106.12	0.790272							90.901	0.350441			145.787	0.473918
																	106.134	0.790272							91.115	0.350441			145.882	0.473918
																	106.134	0.790272							91.328	0.350441			147.229	0.473918
																	106.134	0.79511							91.477	0.350441			148.269	0.473918
																	106.12	0.79511							91.676	0.350441			149.231	0.473918
																	106.134	0.79511							91.864	0.350441			150.178	0.473918
																	106.134	0.79511							92.063	0.350441			151.072	0.473918
																	106.12	0.79511							92.263	0.350441			151.43	0.485241
																	106.12	0.79511							92.436	0.350441			151.203	0.490093
																	106.134	0.79511							92.664	0.355286			151.055	0.490093
																	106.134	0.79511							92.795	0.355286			150.949	0.490093
																	106.134	0.79511							92.915	0.36013			150.855	0.490093
																	106.134	0.79511							92.93	0.36013			150.788	0.490093
																	106.12	0.79511							92.85	0.36013			150.708	0.490093
																	106.107	0.79511							92.783	0.36013			150.642	0.490093
																	106.12	0.79511							92.716	0.36659			150.589	0.490093
																	106.134	0.79511							92.651	0.36659			150.536	0.490093
																	106.134	0.79511							92.582	0.36659			150.484	0.490093
																	106.134	0.79511							92.557	0.36659			150.443	0.490093
																	106.12	0.79511							92.516	0.36659			150.404	0.490093
																	106.12	0.79511							92.464	0.36659			150.377	0.490093
																	106.12	0.79511							92.437	0.36659			150.336	0.490093
																	106.12	0.79511							92.411	0.36659			150.31	0.490093
																	106.12	0.79511							92.344	0.36659			150.273	0.490093
																	106.107	0.79511							92.317	0.36659			150.234	0.490093
																	106.12	0.79511							92.291	0.36659			150.193	0.490093
																	106.134	0.79511							92.252	0.36659			150.169	0.490093
																	106.147	0.79511							92.238	0.36659			150.129	0.490093
																	106.12	0.79511							92.224	0.36659			150.089	0.490093
																	106.107	0.79511							92.198	0.36659			150.048	0.490093
																	106.107	0.79511							92.158	0.36659			150.022	0.490093
																	106.107	0.79511							92.146	0.36659			149.996	0.490093
																	106.12	0.79511							92.133	0.36659			149.968	0.490093
																	106.12	0.79511							92.119	0.36659			149.943	0.490093
																	106.094	0.79511							92.092	0.36659			149.904	0.490093
																	106.107	0.79511							92.079	0.36659			149.875	0.490093
																	106.12	0.79511							92.067	0.36659			149.889	0.490093
																	106.134	0.79511							92.039	0.36659			149.982	0.490093
																	106.107	0.79511							92.134	0.36659			150.064	0.490093
																	106.094	0.79511							92.44	0.36659			150.17	0.490093
																	106.08	0.79511							92.799	0.36659			150.252	0.490093
																	106.094	0.79511							93.174	0.36659			150.356	0.490093
																	106.12	0.79511							93.481	0.36659			150.463	0.490093
																	106.107	0.79511							93.854	0.36659			150.572	0.490093
																	106.107	0.79511							94.175	0.36659			150.677	0.490093
																	106.12	0.79511							94.454	0.36659			150.824	0.490093
																	106.107	0.79511							94.747	0.36659			150.918	0.490093
																	106.12	0.79511							95.04	0.36659			151.038	0.490093
																	106.12	0.79511							95.334	0.36659			151.172	0.490093
																	106.107	0.79511							95.614	0.371435			151.292	0.490093
																	106.094	0.79511							95.707	0.371435			151.384	0.490093
																	106.094	0.79511							95.641	0.37628			151.544	0.490093
																	106.12	0.801561							95.521	0.37628			151.652	0.490093
																	106.12	0.801561							95.468	0.37628			151.798	0.490093
																	106.12	0.801561							95.387	0.38274			151.998	0.490093
																	106.107	0.801561							95.307	0.37628			152.226	0.490093
																	106.094	0.801561							95.254	0.37628			152.452	0.490093
																	106.107	0.801561							95.215	0.37628			152.679	0.490093
																	106.12	0.801561							95.174	0.38274			152.894	0.490093
																	106.12	0.801561							95.12	0.38274			153.145	0.490093
																	106.12	0.801561							95.08	0.38274			153.358	0.490093
																	106.12	0.801561							95.041	0.38274			153.586	0.490093
																	106.134	0.801561							95.015	0.38274			153.813	0.496563
																	106.134	0.801561							94.975	0.38274			153.999	0.506268
																	106.134	0.801561							94.961	0.38274			154.013	0.506268
																	106.12	0.801561							94.935	0.38274			153.948	0.506268
																	106.12	0.801561							94.908	0.38274			153.868	0.506268
																	106.134	0.801561							94.868	0.38274			153.787	0.506268
																	106.134	0.801561							94.841	0.38274			153.734	0.506268
																	106.134	0.801561							94.816	0.38274			153.669	0.506268
																	106.134	0.801561							94.788	0.38274			153.614	0.506268
																	106.134	0.801561							94.776	0.38274			153.6	0.506268
																	106.134	0.801561							94.749	0.38274			153.707	0.506268
																	106.134	0.801561							94.722	0.38274			153.908	0.506268
																	106.12	0.8064							94.696	0.38274			154.067	0.506268
																	106.12	0.8064							94.669	0.38274			154.269	0.506268
																	106.134	0.8064							94.643	0.38274			154.442	0.506268
																	106.147	0.8064							94.63	0.38274			154.629	0.506268
																	106.16	0.8064							94.617	0.38274			154.922	0.506268
																	106.16	0.8064							94.59	0.38274			155.174	0.506268
																	106.174	0.8064							94.577	0.38274			155.417	0.506268
																	106.147	0.8064							94.537	0.38274			155.67	0.506268
																	106.147	0.8064							94.644	0.38274			155.923	0.506268
																	106.147	0.8064							95.099	0.38274			156.175	0.506268
																	106.147	0.8064							95.553	0.38274			156.444	0.506268
																	106.147	0.8064							95.954	0.38274			156.696	0.506268
																	106.16	0.8064							96.301	0.38274			156.976	0.506268
																	106.147	0.8064							96.635	0.38274			157.229	0.506268
																	106.174	0.8064							96.968	0.38274			157.47	0.506268
																	106.174	0.8064							97.301	0.38274			157.777	0.506268
																	106.187	0.8064							97.608	0.38274			158.138	0.506268
																	106.214	0.8064							97.955	0.38274			158.469	0.51759
																	106.214	0.8064							98.25	0.387584			158.484	0.51759
																	106.2	0.8064							98.223	0.387584			158.364	0.522442
																	106.187	0.8064							98.13	0.392429			158.259	0.522442
																	106.174	0.8064							98.039	0.392429			158.165	0.522442
																	106.174	0.8064							97.972	0.392429			158.099	0.522442
																	106.187	0.8064							97.919	0.392429			158.032	0.522442
																	106.187	0.8064							97.893	0.392429			157.979	0.522442
																	106.187	0.8064							97.841	0.392429			157.926	0.522442
																	106.174	0.8064							97.774	0.392429			157.873	0.522442
																	106.174	0.8064							97.735	0.392429			157.818	0.522442
																	106.174	0.8064							97.708	0.392429			157.778	0.522442
																	106.16	0.811238							97.641	0.398889			157.74	0.522442
																	106.174	0.811238							97.601	0.398889			157.697	0.522442
																	106.174	0.811238							97.561	0.398889			157.66	0.522442
																	106.16	0.811238							97.521	0.398889			157.617	0.522442
																	106.16	0.811238							97.468	0.398889			157.7	0.522442
																	106.16	0.811238							97.453	0.398889			157.886	0.522442
																	106.16	0.811238							97.413	0.398889			158.045	0.522442
																	106.16	0.811238							97.386	0.398889			158.205	0.522442
																	106.174	0.811238							97.345	0.398889			158.353	0.522442
																	106.174	0.811238							97.333	0.398889			158.525	0.522442
																	106.174	0.811238							97.28	0.398889			158.686	0.522442
																	106.187	0.811238							97.253	0.398889			158.833	0.522442
																	106.16	0.811238							97.225	0.398889			158.967	0.522442
																	106.147	0.811238							97.199	0.398889			159.112	0.522442
																	106.147	0.811238							97.159	0.398889			159.274	0.522442
																	106.16	0.811238							97.145	0.398889			159.46	0.522442
																	106.16	0.811238							97.119	0.398889			159.713	0.522442
																	106.16	0.811238							97.078	0.398889			159.954	0.522442
																	106.147	0.811238							97.065	0.398889			160.207	0.522442
																	106.134	0.811238							97.052	0.398889			160.474	0.522442
																	106.16	0.811238							97.024	0.398889			160.727	0.522442
																	106.174	0.811238							97.012	0.398889			161.007	0.522442
																	106.174	0.811238							96.999	0.398889			161.247	0.522442
																	106.16	0.811238							96.971	0.398889			161.474	0.522442
																	106.174	0.811238							97.385	0.398889			161.754	0.528912
																	106.186	0.811238							97.906	0.398889			161.848	0.533765
																	106.187	0.811238							98.305	0.398889			161.768	0.538617
																	106.187	0.811238							98.745	0.398889			161.648	0.538617
																	106.187	0.811238							99.105	0.398889			161.581	0.538617
																	106.2	0.811238							99.466	0.398889			161.541	0.538617
																	106.187	0.811238							99.8	0.398889			161.462	0.538617
																	106.199	0.811238							100.147	0.398889			161.396	0.538617
																	106.214	0.811238							100.453	0.403734			161.346	0.538617
																	106.214	0.811238							100.413	0.403734			161.305	0.538617
																	106.187	0.811238							100.294	0.403734			161.251	0.538617
																	106.187	0.811238							100.2	0.408579			161.212	0.538617
																	106.214	0.811238							100.107	0.408579			161.173	0.538617
																	106.214	0.811238							100.053	0.408579			161.12	0.538617
																	106.2	0.811238							100	0.408579			161.081	0.538617
																	106.2	0.811238							99.96	0.408579			161.228	0.538617
																	106.214	0.811238							99.906	0.408579			161.627	0.538617
																	106.214	0.811238							99.88	0.408579			161.948	0.538617
																	106.2	0.811238							99.84	0.408579			162.269	0.538617
																	106.2	0.811238							99.813	0.408579			162.589	0.538617
																	106.214	0.811238							99.774	0.408579			162.896	0.538617
																	106.214	0.811238							99.747	0.415038			163.189	0.538617
																	106.214	0.811238							99.721	0.415038			163.456	0.538617
																	106.2	0.811238							99.708	0.415038			163.749	0.538617
																	106.214	0.811238							99.669	0.415038			164.043	0.538617
																	106.227	0.811238							99.657	0.415038			164.35	0.538617
																	106.24	0.811238							99.617	0.415038			164.684	0.538617
																	106.227	0.811238							99.605	0.415038			164.99	0.538617
																	106.24	0.811238							99.591	0.415038			165.377	0.545087
																	106.254	0.811238							99.566	0.415038			165.698	0.545087
																	106.254	0.811238							99.554	0.415038			166.006	0.545087
																	106.254	0.811238							99.516	0.415038			166.313	0.554792
																	106.254	0.811238							99.504	0.415038			166.273	0.554792
																	106.254	0.811238							99.491	0.415038			166.167	0.554792
																	106.227	0.811238							99.464	0.415038			166.02	0.554792
																	106.214	0.811238							99.453	0.415038			165.954	0.554792
																	106.214	0.817689							99.453	0.415038			165.874	0.554792
																	106.2	0.817689							99.44	0.415038			165.808	0.554792
																	106.214	0.817689							99.427	0.415038			165.753	0.554792
																	106.227	0.817689							99.414	0.415038			165.689	0.554792
																	106.2	0.817689							99.388	0.415038			165.622	0.554792
																	106.214	0.817689							99.374	0.415038			165.594	0.554792
																	106.2	0.817689							99.347	0.415038			165.542	0.554792
																	106.214	0.817689							99.335	0.415038			165.475	0.554792
																	106.214	0.817689							99.6	0.415038			165.411	0.554792
																	106.214	0.817689							100.107	0.415038			165.37	0.554792
																	106.187	0.817689							100.6	0.415038			165.342	0.554792
																	106.2	0.817689							101.053	0.415038			165.303	0.554792
																	106.2	0.817689							101.452	0.415038			165.277	0.554792
																	106.214	0.817689							101.692	0.419883			165.21	0.554792
																	106.2	0.817689							101.61	0.419883			165.223	0.554792
																	106.187	0.817689							101.518	0.419883			165.371	0.554792
																	106.187	0.817689							101.437	0.419883			165.503	0.554792
																	106.2	0.817689							101.357	0.419883			165.666	0.554792
																	106.214	0.817689							101.303	0.419883			165.771	0.554792
																	106.2	0.817689							101.248	0.419883			165.916	0.554792
																	106.187	0.817689							101.207	0.419883			166.049	0.554792
																	106.187	0.817689							101.127	0.419883			166.2	0.554792
																	106.187	0.817689							101.1	0.419883			166.331	0.554792
																	106.2	0.817689							101.472	0.419883			166.477	0.554792
																	106.2	0.817689							101.952	0.419883			166.638	0.554792
																	106.187	0.817689							102.432	0.419883			166.783	0.554792
																	106.187	0.817689							102.805	0.424728			166.944	0.554792
																	106.187	0.817689							102.805	0.424728			167.104	0.554792
																	106.187	0.817689							102.712	0.424728			167.278	0.554792
																	106.187	0.817689							102.631	0.424728			167.518	0.561262
																	106.174	0.817689							102.551	0.431188			167.744	0.561262
																	106.187	0.817689							102.485	0.431188			167.917	0.561262
																	106.174	0.817689							102.431	0.431188			168.105	0.561262
																	106.16	0.817689							102.364	0.431188			168.265	0.561262
																	106.16	0.817689							102.311	0.431188			168.491	0.561262
																	106.16	0.817689							102.245	0.431188			168.704	0.561262
																	106.174	0.817689							102.218	0.431188			168.878	0.561262
																	106.174	0.817689							102.177	0.431188			168.985	0.570966
																	106.174	0.817689							102.138	0.431188			168.971	0.570966
																	106.2	0.817689							102.111	0.431188			168.934	0.570966
																	106.214	0.817689							102.046	0.431188			168.853	0.570966
																	106.2	0.817689							102.018	0.431188			168.773	0.570966
																	106.187	0.817689							101.978	0.431188			168.718	0.570966
																	106.187	0.817689							101.951	0.431188			168.639	0.570966
																	106.2	0.817689							101.911	0.431188			168.585	0.570966
																	106.187	0.817689							101.898	0.431188			168.559	0.570966
																	106.2	0.817689							101.872	0.431188			168.494	0.570966
																	106.2	0.817689							101.846	0.431188			168.439	0.570966
																	106.2	0.817689							101.819	0.431188			168.388	0.570966
																	106.214	0.817689							101.778	0.431188			168.374	0.570966
																	106.227	0.817689							101.764	0.431188			168.576	0.570966
																	106.214	0.817689							101.75	0.431188			168.788	0.570966
																	106.214	0.817689							102.112	0.431188			169.135	0.570966
																	106.187	0.817689							102.753	0.431188			169.429	0.570966
																	106.187	0.817689							103.258	0.431188			169.763	0.570966
																	106.187	0.817689							103.739	0.436032			170.002	0.570966
																	106.187	0.822528							103.766	0.436032			170.283	0.570966
																	106.2	0.822528							103.673	0.436032			170.562	0.570966
																	106.214	0.822528							103.579	0.436032			170.856	0.570966
																	106.214	0.822528							103.472	0.436032			171.032	0.577436
																	106.214	0.822528							103.432	0.436032			170.989	0.577436
																	106.2	0.822528							103.393	0.436032			170.908	0.577436
																	106.2	0.827366							103.326	0.436032			171.161	0.577436
																	106.16	0.827366							103.298	0.436032			171.427	0.577436
																	106.16	0.827366							103.232	0.436032			171.76	0.577436
																	106.147	0.827366							103.22	0.436032			172.119	0.577436
																	106.147	0.827366							103.179	0.436032			172.44	0.577436
																	106.174	0.827366							103.766	0.436032			172.8	0.577436
																	106.2	0.827366							104.42	0.436032			173.066	0.582289
																	106.187	0.827366							104.94	0.436032			172.987	0.587141
																	106.187	0.827366							105.259	0.440877			172.879	0.587141
																	106.2	0.827366							105.167	0.440877			172.773	0.587141
																	106.2	0.827366							105.033	0.440877			172.707	0.587141
																	106.214	0.827366							104.952	0.440877			172.64	0.587141
																	106.2	0.827366							104.888	0.440877			172.548	0.587141
																	106.2	0.827366							104.821	0.440877			172.495	0.587141
																	106.187	0.827366							104.755	0.440877			172.453	0.587141
																	106.2	0.827366							104.701	0.440877			172.386	0.587141
																	106.2	0.827366							104.662	0.447337			172.347	0.587141
																	106.214	0.827366							104.596	0.447337			172.293	0.587141
																	106.227	0.827366							104.583	0.447337			172.253	0.587141
																	106.227	0.827366							104.544	0.447337			172.215	0.587141
																	106.227	0.827366							104.504	0.447337			172.175	0.587141
																	106.227	0.827366							104.463	0.447337			172.121	0.587141
																	106.24	0.827366							104.424	0.447337			172.135	0.587141
																	106.267	0.827366							104.384	0.447337			172.561	0.587141
																	106.28	0.827366							104.358	0.447337			172.988	0.587141
																	106.267	0.827366							104.331	0.447337			173.418	0.587141
																	106.267	0.827366							104.291	0.447337			173.868	0.587141
																	106.24	0.827366							104.279	0.447337			174.228	0.593611
																	106.24	0.827366							104.252	0.447337			174.377	0.593611
																	106.227	0.827366							104.212	0.447337			174.269	0.593611
																	106.227	0.827366							104.188	0.447337			174.162	0.593611
																	106.267	0.827366							104.161	0.447337			174.094	0.593611
																	106.254	0.827366							104.133	0.447337			173.988	0.593611
																	106.254	0.827366							104.107	0.447337			173.935	0.593611
																	106.254	0.827366							104.574	0.447337			174.202	0.593611
																	106.24	0.827366							105.239	0.452182			174.708	0.593611
																	106.254	0.827366							105.508	0.452182			175.177	0.593611
																	106.24	0.827366							105.454	0.452182			175.683	0.593611
																	106.254	0.827366							105.386	0.452182			176.151	0.593611
																	106.254	0.827366							105.308	0.452182			176.646	0.593611
																	106.254	0.827366							105.268	0.452182			176.818	0.603316
																	106.254	0.827366							105.229	0.452182			176.698	0.603316
																	106.267	0.827366							105.177	0.452182			176.564	0.603316
																	106.28	0.827366							105.136	0.452182			176.46	0.603316
																	106.28	0.827366							105.109	0.452182			176.391	0.603316
																	106.254	0.827366							105.071	0.452182			176.312	0.603316
																	106.28	0.827366							105.045	0.452182			176.246	0.603316
																	106.267	0.827366							105.02	0.452182			176.152	0.603316
																	106.28	0.827366							105.113	0.452182			176.1	0.603316
																	106.28	0.827366							105.833	0.452182			176.046	0.603316
																	106.28	0.827366							106.461	0.452182			175.994	0.603316
																	106.294	0.827366							107.035	0.457027			175.954	0.603316
																	106.294	0.827366							107.168	0.457027			175.888	0.603316
																	106.307	0.827366							107.075	0.457027			175.834	0.603316
																	106.294	0.827366							106.942	0.457027			175.794	0.603316
																	106.267	0.827366							106.85	0.457027			175.754	0.603316
																	106.254	0.827366							106.782	0.457027			175.728	0.603316
																	106.267	0.827366							106.715	0.457027			176.01	0.603316
																	106.267	0.827366							106.675	0.463486			176.57	0.609786
																	106.267	0.827366							106.621	0.463486			176.583	0.609786
																	106.294	0.827366							106.581	0.463486			176.516	0.609786
																	106.307	0.827366							106.527	0.463486			176.463	0.609786
																	106.32	0.827366							106.459	0.463486			176.369	0.609786
																	106.307	0.827366							106.42	0.468331			176.329	0.609786
																	106.294	0.827366							106.379	0.468331			176.278	0.609786
																	106.267	0.827366							106.353	0.468331			176.25	0.609786
																	106.267	0.827366							106.313	0.468331			176.197	0.609786
																	106.267	0.827366							106.298	0.468331			176.143	0.609786
																	106.254	0.827366							106.245	0.468331			176.316	0.609786
																	106.28	0.827366							106.218	0.468331			177.089	0.609786
																	106.267	0.827366							106.205	0.468331			177.705	0.609786
																	106.254	0.827366							106.179	0.468331			178.251	0.609786
																	106.24	0.827366							106.138	0.468331			178.77	0.609786
																	106.24	0.827366							106.11	0.468331			179.304	0.609786
																	106.24	0.827366							106.071	0.468331			179.797	0.609786
																	106.24	0.827366							106.058	0.468331			180.025	0.61949
																	106.254	0.827366							106.032	0.468331			179.865	0.61949
																	106.254	0.827366							106.004	0.468331			179.717	0.61949
																	106.267	0.827366							105.99	0.468331			179.625	0.61949
																	106.267	0.827366							105.964	0.468331			179.505	0.61949
																	106.267	0.827366							105.938	0.468331			179.437	0.61949
																	106.254	0.827366							105.911	0.468331			179.361	0.61949
																	106.267	0.827366							105.898	0.468331			179.294	0.61949
																	106.267	0.827366							105.87	0.468331			179.238	0.62596
																	106.24	0.827366							105.844	0.468331			179.2	0.62596
																	106.24	0.827366							105.831	0.468331			179.147	0.62596
																	106.24	0.827366							105.818	0.468331			179.105	0.62596
																	106.228	0.827366							105.777	0.468331			179.067	0.62596
																	106.227	0.827366							105.765	0.468331			179.027	0.62596
																	106.227	0.827366							105.738	0.468331			179.001	0.62596
																	106.254	0.827366							105.697	0.468331			178.947	0.62596
																	106.267	0.827366							105.685	0.468331			178.906	0.62596
																	106.267	0.827366							106.11	0.468331			178.867	0.62596
																	106.254	0.827366							106.819	0.468331			178.827	0.62596
																	106.254	0.827366							107.5	0.468331			178.8	0.62596
																	106.28	0.827366							108.1	0.468331			178.761	0.62596
																	106.267	0.827366							108.632	0.468331			178.733	0.62596
																	106.254	0.827366							109.166	0.473176			178.72	0.62596
																	106.254	0.827366							109.166	0.473176			178.681	0.62596
																	106.254	0.827366							109.034	0.473176			178.655	0.62596
																	106.254	0.827366							108.9	0.473176			178.615	0.62596
																	106.267	0.827366							108.807	0.473176			178.6	0.62596
																	106.254	0.827366							108.74	0.479636			178.575	0.62596
																	106.28	0.827366							108.673	0.479636			179.321	0.62596
																	106.294	0.827366							108.607	0.479636			180.056	0.62596
																	106.294	0.827366							108.568	0.479636			180.683	0.62596
																	106.28	0.827366							108.514	0.479636			181.299	0.62596
																	106.254	0.827366							108.488	0.479636			181.831	0.62596
																	106.255	0.827366							108.434	0.48448			182.363	0.62596
																	106.24	0.827366							108.394	0.48448			182.964	0.62596
																	106.227	0.827366							108.352	0.48448			183.216	0.635665
																	106.227	0.827366							108.312	0.48448			183.096	0.635665
																	106.24	0.827366							108.273	0.48448			182.949	0.635665
																	106.24	0.827366							108.233	0.48448			182.829	0.635665
																	106.24	0.827366							108.207	0.48448			182.764	0.635665
																	106.24	0.827366							108.167	0.48448			182.683	0.635665
																	106.24	0.827366							108.14	0.48448			182.617	0.642135
																	106.227	0.827366							108.113	0.48448			182.577	0.642135
																	106.227	0.827366							108.087	0.48448			182.498	0.642135
																	106.267	0.827366							108.047	0.48448			182.43	0.642135
																	106.267	0.827366							108.021	0.48448			182.379	0.642135
																	106.254	0.827366							107.994	0.48448			182.338	0.642135
																	106.24	0.827366							107.967	0.48448			182.298	0.642135
																	106.24	0.827366							107.926	0.48448			182.244	0.642135
																	106.254	0.827366							107.913	0.48448			182.193	0.642135
																	106.24	0.827366							107.886	0.48448			182.151	0.642135
																	106.24	0.827366							107.862	0.48448			182.098	0.642135
																	106.254	0.827366							107.834	0.48448			182.072	0.642135
																	106.254	0.827366							107.807	0.48448			182.019	0.642135
																	106.267	0.827366							107.781	0.48448			181.978	0.642135
																	106.254	0.827366							107.756	0.48448			181.939	0.642135
																	106.254	0.827366							107.742	0.48448			181.912	0.642135
																	106.24	0.827366							107.727	0.48448			181.872	0.642135
																	106.24	0.827366							107.702	0.48448			181.818	0.642135
																	106.254	0.827366							107.688	0.48448			181.78	0.642135
																	106.254	0.827366							107.661	0.48448			181.738	0.642135
																	106.227	0.827366							108.075	0.48448			181.697	0.642135
																	106.227	0.827366							108.876	0.48448			181.711	0.642135
																	106.227	0.827366							109.541	0.48448			181.778	0.642135
																	106.254	0.827366							110.17	0.48448			181.926	0.642135
																	106.267	0.827366							110.782	0.48448			182.045	0.642135
																	106.267	0.827366							111.196	0.489325			182.192	0.642135
																	106.254	0.827366							111.103	0.489325			182.312	0.642135
																	106.24	0.827366							110.969	0.489325			182.406	0.642135
																	106.254	0.827366							110.836	0.489325			182.539	0.642135
																	106.24	0.827366							110.756	0.489325			182.66	0.642135
																	106.24	0.827366							110.675	0.495785			182.792	0.642135
																	106.227	0.827366							110.609	0.495785			182.912	0.642135
																	106.214	0.827366							110.529	0.495785			183.019	0.642135
																	106.214	0.827366							110.489	0.495785			183.154	0.642135
																	106.24	0.827366							110.45	0.495785			183.313	0.642135
																	106.24	0.827366							110.397	0.495785			183.459	0.642135
																	106.24	0.827366							110.357	0.50063			183.579	0.642135
																	106.254	0.827366							110.317	0.50063			183.794	0.642135
																	106.254	0.827366							110.263	0.50063			184.018	0.642135
																	106.254	0.827366							110.225	0.50063			184.259	0.642135
																	106.254	0.827366							110.197	0.50063			184.501	0.642135
																	106.254	0.827366							110.156	0.50063			184.739	0.642135
																	106.254	0.827366							110.117	0.50063			184.968	0.642135
																	106.24	0.827366							110.076	0.50063			185.181	0.65184
																	106.24	0.822528							110.037	0.50063			185.221	0.65184
																	106.214	0.822528							110.024	0.50063			185.166	0.65184
																	106.214	0.822528							109.997	0.50063			185.262	0.65831
																	106.187	0.822528							109.97	0.50063			185.315	0.65831
																	106.174	0.822528							109.916	0.50063			185.262	0.65831
																	106.187	0.822528							109.89	0.50063			185.211	0.65831
																	106.16	0.822528							109.878	0.50063			185.131	0.65831
																	106.147	0.822528							109.839	0.50063			185.09	0.65831
																	106.147	0.822528							109.813	0.50063			185.037	0.65831
																	106.147	0.822528							109.787	0.50063			184.971	0.65831
																	106.187	0.822528							109.76	0.50063			184.932	0.65831
																	106.2	0.822528							109.734	0.50063			184.894	0.65831
																	106.187	0.822528							109.72	0.50063			184.841	0.65831
																	106.187	0.822528							109.694	0.50063			184.908	0.65831
																	106.187	0.822528							109.669	0.50063			185.16	0.65831
																	106.174	0.822528							109.642	0.50063			185.36	0.65831
																	106.187	0.822528							109.628	0.50063			185.586	0.65831
																	106.16	0.822528							109.576	0.50063			185.853	0.65831
																	106.16	0.822528							109.562	0.50063			186.118	0.65831
																	106.147	0.822528							109.549	0.50063			186.4	0.65831
																	106.174	0.822528							109.55	0.50063			186.665	0.65831
																	106.187	0.822528							109.616	0.50063			186.906	0.65831
																	106.2	0.822528							109.723	0.50063			187.187	0.65831
																	106.214	0.822528							109.802	0.50063			187.414	0.65831
																	106.187	0.822528							109.923	0.50063			187.693	0.65831
																	106.2	0.822528							110.016	0.50063			187.961	0.65831
																	106.214	0.822528							110.096	0.50063			188.214	0.65831
																	106.214	0.822528							110.19	0.50063			188.481	0.65831
																	106.214	0.822528							110.31	0.50063			188.747	0.65831
																	106.214	0.822528							110.379	0.50063			189.014	0.668015
																	106.2	0.822528							110.446	0.50063			188.947	0.674484
																	106.187	0.822528							110.552	0.50063			188.829	0.674484
																	106.174	0.822528							110.657	0.50063			188.734	0.674484
																	106.174	0.822528							110.724	0.50063			188.658	0.674484
																	106.174	0.822528							110.833	0.50063			188.577	0.674484
																	106.187	0.822528							110.925	0.505475			188.536	0.674484
																	106.2	0.822528							110.979	0.505475			188.469	0.674484
																	106.187	0.822528							111.031	0.505475			188.418	0.674484
																	106.187	0.822528							111.059	0.505475			188.364	0.674484
																	106.2	0.822528							111.139	0.505475			188.323	0.674484
																	106.214	0.822528							111.312	0.505475			188.257	0.674484
																	106.214	0.822528							111.432	0.505475			188.203	0.674484
																	106.187	0.822528							111.552	0.505475			188.163	0.674484
																	106.16	0.822528							111.699	0.505475			188.122	0.674484
																	106.147	0.822528							111.819	0.505475			188.072	0.674484
																	106.147	0.822528							111.966	0.511934			188.032	0.674484
																	106.159	0.822528							112.006	0.511934			187.991	0.674484
																	106.16	0.822528							111.952	0.511934			187.965	0.674484
																	106.16	0.822528							111.872	0.516779			187.952	0.674484
																	106.174	0.822528							111.805	0.516779			188.071	0.674484
																	106.174	0.822528							111.75	0.516779			188.244	0.674484
																	106.174	0.822528							111.698	0.516779			188.34	0.674484
																	106.16	0.822528							111.644	0.516779			188.499	0.674484
																	106.174	0.822528							111.606	0.516779			188.644	0.674484
																	106.187	0.822528							111.577	0.516779			188.764	0.674484
																	106.174	0.822528							111.51	0.516779			188.9	0.674484
																	106.187	0.822528							111.457	0.516779			189.033	0.674484
																	106.187	0.822528							111.442	0.516779			189.167	0.674484
																	106.187	0.822528							111.403	0.516779			189.327	0.674484
																	106.187	0.822528							111.376	0.516779			189.459	0.674484
																	106.187	0.822528							111.336	0.516779			189.633	0.674484
																	106.187	0.822528							111.297	0.516779			189.766	0.674484
																	106.2	0.822528							111.243	0.516779			189.968	0.674484
																	106.187	0.822528							111.217	0.516779			190.22	0.674484
																	106.187	0.822528							111.189	0.516779			190.475	0.674484
																	106.174	0.822528							111.177	0.516779			190.714	0.674484
																	106.187	0.822528							111.298	0.516779			190.929	0.674484
																	106.2	0.822528							111.471	0.516779			191.18	0.674484
																	106.187	0.822528							111.631	0.516779			191.421	0.674484
																	106.187	0.822528							111.899	0.516779			191.622	0.684189
																	106.2	0.822528							112.125	0.516779			191.634	0.690659
																	106.214	0.822528							112.325	0.516779			191.542	0.690659
																	106.227	0.822528							112.539	0.516779			191.449	0.690659
																	106.214	0.822528							112.753	0.516779			191.354	0.690659
																	106.187	0.822528							112.926	0.516779			191.276	0.690659
																	106.187	0.822528							113.113	0.516779			191.209	0.690659
																	106.187	0.822528							113.233	0.521624			191.143	0.690659
																	106.2	0.822528							113.193	0.521624			191.089	0.690659
																	106.2	0.822528							113.126	0.521624			191.038	0.690659
																	106.187	0.822528							113.034	0.521624			190.984	0.690659
																	106.174	0.822528							112.967	0.521624			190.944	0.690659
																	106.16	0.822528							113.074	0.521624			190.903	0.690659
																	106.16	0.822528							113.288	0.521624			190.877	0.690659
																	106.147	0.822528							113.515	0.521624			190.863	0.690659
																	106.12	0.822528							113.795	0.521624			190.997	0.690659
																	106.12	0.822528							114.035	0.521624			191.17	0.690659
																	106.12	0.822528							114.155	0.528084			191.331	0.690659
																	106.12	0.822528							114.076	0.532929			191.518	0.690659
																	106.107	0.822528							114.009	0.532929			191.675	0.690659
																	106.094	0.822528							113.902	0.532929			191.81	0.690659
																	106.094	0.822528							113.862	0.532929			191.958	0.690659
																	106.067	0.822528							113.783	0.532929			192.131	0.690659
																	106.08	0.822528							113.743	0.532929			192.264	0.690659
																	106.12	0.822528							113.677	0.532929			192.439	0.690659
																	106.12	0.822528							113.609	0.532929			192.585	0.690659
																	106.107	0.822528							113.555	0.532929			192.784	0.690659
																	106.094	0.822528							113.528	0.532929			193.037	0.690659
																	106.107	0.822528							113.476	0.532929			193.304	0.690659
																	106.12	0.822528							113.436	0.532929			193.584	0.690659
																	106.107	0.822528							113.409	0.532929			193.811	0.690659
																	106.107	0.822528							113.344	0.532929			194.078	0.690659
																	106.094	0.822528							113.317	0.532929			194.317	0.695512
																	106.094	0.822528							113.29	0.532929			194.506	0.700364
																	106.107	0.822528							113.251	0.532929			194.531	0.706834
																	106.107	0.822528							113.224	0.532929			194.425	0.706834
																	106.107	0.817689							113.197	0.532929			194.291	0.706834
																	106.08	0.817689							113.158	0.532929			194.226	0.706834
																	106.094	0.817689							113.13	0.532929			194.158	0.706834
																	106.12	0.817689							113.09	0.532929			194.105	0.706834
																	106.12	0.817689							113.063	0.532929			194.038	0.706834
																	106.094	0.817689							113.237	0.532929			193.971	0.706834
																	106.094	0.817689							113.544	0.532929			193.919	0.706834
																	106.094	0.817689							113.837	0.532929			193.878	0.706834
																	106.107	0.817689							114.211	0.532929			193.841	0.706834
																	106.12	0.817689							114.558	0.532929			193.787	0.706834
																	106.107	0.817689							114.759	0.537773			193.746	0.706834
																	106.107	0.817689							114.718	0.537773			193.694	0.706834
																	106.107	0.817689							114.612	0.537773			193.654	0.706834
																	106.107	0.817689							114.545	0.537773			193.614	0.706834
																	106.094	0.817689							114.452	0.537773			193.84	0.706834
																	106.094	0.817689							114.385	0.537773			194.215	0.706834
																	106.067	0.817689							114.332	0.537773			194.56	0.706834
																	106.054	0.817689							114.293	0.537773			194.841	0.706834
																	106.054	0.817689							114.253	0.537773			195.188	0.706834
																	106.067	0.817689							114.199	0.537773			195.428	0.706834
																	106.067	0.817689							114.465	0.537773			195.735	0.706834
																	106.054	0.817689							114.853	0.537773			196.002	0.706834
																	106.054	0.817689							115.185	0.544233			196.268	0.706834
																	106.054	0.817689							115.187	0.544233			196.588	0.706834
																	106.067	0.817689							115.106	0.544233			196.856	0.706834
																	106.067	0.817689							115.027	0.549078			197.162	0.711686
																	106.054	0.817689							114.946	0.549078			197.441	0.711686
																	106.027	0.817689							114.866	0.549078			197.617	0.723008
																	106.04	0.817689							114.799	0.549078			197.522	0.723008
																	106.054	0.817689							114.76	0.549078			197.388	0.723008
																	106.027	0.817689							114.707	0.549078			197.282	0.723008
																	106.014	0.817689							114.68	0.549078			197.217	0.723008
																	105.974	0.817689							114.639	0.549078			197.138	0.723008
																	105.974	0.817689							114.587	0.549078			197.084	0.723008
																	106.027	0.817689							114.548	0.549078			197.004	0.723008
																	106.027	0.817689							114.507	0.549078			196.952	0.723008
																	106.027	0.817689							114.48	0.549078			196.899	0.723008
																	106.014	0.817689							114.441	0.549078			196.834	0.723008
																	106	0.817689							114.391	0.549078			196.78	0.723008
																	106.014	0.817689							114.35	0.549078			196.726	0.723008
																	106.014	0.817689							114.323	0.549078			196.686	0.723008
																	106.014	0.817689							114.283	0.549078			196.635	0.723008
																	105.974	0.817689							114.272	0.549078			196.594	0.723008
																	105.974	0.817689							114.232	0.549078			196.54	0.723008
																	105.96	0.817689							114.205	0.549078			196.5	0.723008
																	106	0.817689							114.178	0.549078			196.461	0.723008
																	105.987	0.811238							114.125	0.549078			196.42	0.723008
																	106	0.811238							114.098	0.549078			196.394	0.723008
																	105.974	0.811238							114.084	0.549078			196.407	0.723008
																	105.987	0.811238							114.284	0.549078			196.901	0.723008
																	106	0.811238							114.818	0.549078			197.423	0.723008
																	105.987	0.811238							115.246	0.549078			197.969	0.723008
																	105.974	0.811238							115.7	0.553923			198.461	0.723008
																	105.974	0.811238							115.861	0.553923			198.877	0.723008
																	105.974	0.811238							115.779	0.553923			199.302	0.723008
																	105.987	0.811238							115.685	0.553923			199.727	0.723008
																	105.974	0.811238							115.593	0.553923			199.941	0.727861
																	105.987	0.811238							115.527	0.553923			199.808	0.727861
																	105.96	0.811238							115.458	0.553923			199.69	0.732713
																	105.947	0.811238							115.392	0.553923			199.568	0.732713
																	105.974	0.811238							115.352	0.553923			199.476	0.739183
																	105.974	0.811238							115.302	0.553923			199.409	0.739183
																	105.96	0.811238							115.261	0.553923			199.33	0.739183
																	105.947	0.811238							115.233	0.553923			199.262	0.739183
																	105.96	0.811238							115.673	0.553923			199.196	0.739183
																	105.987	0.811238							116.154	0.553923			199.142	0.739183
																	105.96	0.811238							116.633	0.560382			199.103	0.739183
																	105.947	0.811238							116.78	0.565227			199.036	0.739183
																	105.974	0.811238							116.674	0.565227			198.999	0.739183
																	105.987	0.811238							116.554	0.565227			198.943	0.739183
																	106.014	0.811238							116.474	0.565227			198.902	0.739183
																	105.974	0.811238							116.394	0.565227			198.863	0.739183
																	105.987	0.811238							116.314	0.565227			198.823	0.739183
																	105.987	0.811238							116.26	0.565227			198.783	0.739183
																	105.987	0.811238							116.219	0.565227			198.731	0.739183
																	106.014	0.811238							116.154	0.565227			198.69	0.739183
																	106	0.811238							116.114	0.565227			198.652	0.739183
																	105.987	0.811238							116.074	0.565227			198.612	0.739183
																	106.027	0.811238							116.007	0.565227			198.572	0.739183
																	106.027	0.811238							115.953	0.565227			198.531	0.739183
																	106.054	0.811238							115.915	0.565227			198.478	0.739183
																	106.067	0.811238							115.875	0.565227			198.452	0.739183
																	106.027	0.811238							115.848	0.565227			198.412	0.739183
																	106.014	0.811238							115.821	0.565227			198.397	0.739183
																	106.027	0.811238							115.767	0.565227			198.489	0.739183
																	106.054	0.811238							115.713	0.565227			198.625	0.739183
																	106.04	0.811238							115.69	0.565227			198.744	0.739183
																	106.027	0.8064							115.649	0.565227			198.864	0.739183
																	106.027	0.8064							115.62	0.565227			198.985	0.739183
																	106	0.8064							115.595	0.565227			199.12	0.739183
																	106.014	0.8064							115.555	0.565227			199.224	0.739183
																	106.027	0.8064							115.501	0.565227			199.371	0.739183
																	106	0.8064							115.474	0.565227			199.48	0.744036
																	105.96	0.8064							115.915	0.565227			199.519	0.744036
																	105.96	0.8064							116.436	0.570072			199.452	0.744036
																	105.987	0.8064							116.463	0.570072			199.467	0.744036
																	106.04	0.8064							116.409	0.570072			199.548	0.744036
																	106	0.8064							116.317	0.570072			199.642	0.744036
																	106.054	0.8064							116.249	0.570072			199.761	0.744036
																	106	0.8064							116.184	0.570072			199.936	0.744036
																	106.04	0.8064							116.13	0.570072			200.151	0.744036
																	106.027	0.8064							116.09	0.570072			200.35	0.744036
																	106.027	0.8064							116.037	0.570072			200.511	0.748888
																	106.04	0.8064							115.982	0.570072			200.498	0.748888
																	106.054	0.8064							115.931	0.570072			200.461	0.748888
																	106.054	0.8064							115.891	0.570072			200.472	0.744036
																	106.094	0.8064							115.836	0.570072			200.739	0.748888
																	106.054	0.8064							115.81	0.570072			200.9	0.748888
																	106.04	0.8064							116.398	0.570072			201.062	0.748888
																	106.04	0.8064							117.039	0.570072			201.234	0.748888
																	106.04	0.8064							117.385	0.576532			201.395	0.748888
																	106.054	0.8064							117.344	0.581377			201.674	0.748888
																	106.027	0.8064							117.226	0.581377			201.769	0.755358
																	106.014	0.8064							117.105	0.581377			201.714	0.755358
																	106.014	0.8064							117.038	0.581377			201.608	0.755358
																	106.027	0.8064							116.944	0.581377			201.528	0.755358
																	106.027	0.8064							116.891	0.581377			201.462	0.755358
																	106.014	0.8064							116.825	0.581377			201.396	0.755358
																	106	0.8064							116.77	0.581377			201.355	0.755358
																	106	0.8064							116.744	0.581377			201.581	0.755358
																	106.027	0.8064							116.679	0.581377			201.89	0.755358
																	106.027	0.8064							116.638	0.581377			202.182	0.755358
																	106	0.8064							116.598	0.581377			202.461	0.755358
																	106	0.8064							116.559	0.581377			202.823	0.755358
																	106	0.8064							116.506	0.581377			203.181	0.755358
																	106	0.8064							116.479	0.581377			203.46	0.755358
																	106	0.8064							116.439	0.581377			203.793	0.76021
																	105.987	0.8064							116.384	0.581377			203.873	0.76021
																	105.974	0.8064							116.359	0.581377			203.78	0.765063
																	106	0.8064							116.32	0.581377			203.66	0.765063
																	106	0.8064							116.292	0.581377			203.564	0.765063
																	106	0.8064							116.255	0.581377			203.488	0.765063
																	106	0.8064							116.213	0.581377			203.419	0.765063
																	105.96	0.8064							116.171	0.586221			203.352	0.765063
																	105.96	0.8064							116.144	0.586221			203.301	0.765063
																	105.974	0.8064							116.119	0.586221			203.22	0.765063
																	105.987	0.8064							116.079	0.586221			203.18	0.765063
																	105.987	0.8064							116.039	0.586221			203.126	0.765063
																	105.974	0.8064							116.012	0.586221			203.084	0.765063
																	105.947	0.8064							115.958	0.586221			203.047	0.765063
																	105.92	0.8064							115.945	0.586221			202.965	0.765063
																	105.934	0.8064							115.918	0.586221			202.927	0.765063
																	105.96	0.8064							115.878	0.586221			203.114	0.765063
																	105.947	0.8064							115.852	0.586221			203.5	0.765063
																	105.934	0.8064							115.812	0.586221			203.941	0.765063
																	105.947	0.8064							115.786	0.586221			204.248	0.765063
																	105.96	0.8064							115.744	0.586221			204.677	0.771533
																	105.96	0.8064							115.706	0.586221			204.781	0.771533
																	105.96	0.8064							115.678	0.586221			204.676	0.771533
																	105.974	0.8064							115.652	0.586221			204.581	0.771533
																	105.974	0.8064							115.612	0.586221			204.474	0.771533
																	105.96	0.8064							115.812	0.586221			204.382	0.771533
																	105.96	0.8064							116.584	0.586221			204.33	0.771533
																	105.974	0.8064							117.227	0.586221			204.329	0.771533
																	105.96	0.8064							117.745	0.586221			204.863	0.771533
																	105.947	0.8064							118.28	0.592681			205.318	0.771533
																	105.947	0.8064							118.305	0.597526			205.743	0.771533
																	105.947	0.8064							118.173	0.597526			206.157	0.771533
																	105.947	0.8064							118.04	0.597526			206.652	0.776385
																	105.947	0.8064							117.934	0.597526			206.796	0.776385
																	105.934	0.8064							117.854	0.597526			206.663	0.781237
																	105.92	0.8064							117.746	0.597526			206.544	0.781237
																	105.934	0.8064							117.693	0.597526			206.45	0.781237
																	105.934	0.8064							117.641	0.597526			206.37	0.781237
																	105.92	0.8064							117.573	0.597526			206.305	0.781237
																	105.92	0.8064							117.532	0.597526			206.213	0.781237
																	105.894	0.8064							117.494	0.597526			206.145	0.781237
																	105.934	0.8064							117.441	0.597526			206.09	0.781237
																	105.96	0.8064							117.387	0.597526			206.052	0.781237
																	105.96	0.8064							117.361	0.602371			206.013	0.781237
																	105.947	0.8064							117.308	0.602371			205.959	0.781237
																	105.96	0.8064							117.267	0.602371			205.92	0.781237
																	105.974	0.801561							117.229	0.602371			205.881	0.781237
																	105.96	0.801561							117.201	0.602371			205.842	0.781237
																	105.974	0.801561							117.121	0.602371			205.788	0.781237
																	105.987	0.801561							117.093	0.602371			205.735	0.781237
																	105.974	0.801561							117.067	0.602371			205.855	0.781237
																	105.974	0.801561							117.04	0.602371			206.255	0.787707
																	105.987	0.801561							116.988	0.602371			206.591	0.781237
																	105.947	0.801561							116.947	0.602371			206.817	0.787707
																	105.934	0.801561							116.907	0.602371			206.738	0.787707
																	105.92	0.801561							116.868	0.602371			206.632	0.79256
																	105.934	0.801561							116.829	0.602371			206.564	0.787707
																	105.934	0.801561							116.801	0.602371			206.499	0.787707
																	105.92	0.801561							116.762	0.602371			206.444	0.787707
																	105.894	0.801561							116.735	0.602371			206.391	0.787707
																	105.934	0.801561							116.695	0.602371			206.338	0.787707
																	105.947	0.801561							116.642	0.602371			206.313	0.79256
																	105.974	0.801561							116.615	0.602371			206.273	0.79256
																	105.947	0.801561							116.588	0.602371			206.232	0.79256
																	105.947	0.801561							116.533	0.602371			206.193	0.79256
																	105.947	0.801561							116.522	0.602371			206.153	0.79256
																	105.947	0.801561							116.508	0.602371			206.126	0.797412
																	105.947	0.801561							116.455	0.602371			206.099	0.797412
																	105.96	0.801561							116.428	0.602371			206.046	0.797412
																	105.974	0.801561							116.936	0.602371			206.007	0.797412
																	105.974	0.801561							117.656	0.602371			205.979	0.797412
																	105.974	0.801561							118.27	0.602371			205.941	0.797412
																	105.987	0.801561							118.63	0.60883			205.914	0.797412
																	105.974	0.801561							118.525	0.60883			205.886	0.797412
																	105.947	0.801561							118.39	0.613675			205.847	0.797412
																	105.974	0.801561							118.271	0.613675			205.82	0.797412
																	105.974	0.79511							118.177	0.613675			205.795	0.797412
																	105.974	0.79511							118.111	0.613675			205.769	0.797412
																	105.96	0.79511							118.031	0.613675			205.757	0.797412
																	105.947	0.79511							117.978	0.613675			205.718	0.797412
																	105.947	0.79511							117.911	0.613675			205.691	0.797412
																	105.947	0.79511							117.858	0.613675			205.676	0.797412
																	105.96	0.79511							117.804	0.613675			205.652	0.797412
																	105.987	0.79511							117.763	0.613675			205.638	0.797412
																	105.974	0.79511							117.711	0.613675			205.692	0.797412
																	105.96	0.79511							117.672	0.613675			206.466	0.797412
																	105.96	0.79511							117.605	0.613675			207.078	0.797412
																	105.974	0.79511							117.564	0.613675			207.72	0.797412
																	105.974	0.79511							117.538	0.61852			208.306	0.797412
																	105.96	0.79511							117.512	0.61852			208.719	0.803882
																	105.947	0.79511							117.472	0.61852			208.625	0.803882
																	105.947	0.79511							117.431	0.61852			208.479	0.803882
																	105.92	0.79511							117.392	0.61852			208.384	0.803882
																	105.934	0.79511							117.353	0.61852			208.32	0.803882
																	105.907	0.79511							117.312	0.61852			208.225	0.808734
																	105.894	0.79511							117.273	0.61852			208.158	0.808734
																	105.907	0.79511							117.234	0.61852			208.104	0.808734
																	105.907	0.79511							117.194	0.61852			208.053	0.808734
																	105.907	0.79511							117.141	0.61852			208.025	0.808734
																	105.88	0.79511							117.1	0.61852			207.959	0.813587
																	105.854	0.79511							117.074	0.61852			207.918	0.813587
																	105.854	0.79511							117.048	0.61852			207.879	0.813587
																	105.854	0.79511							116.994	0.61852			207.866	0.813587
																	105.854	0.79511							116.982	0.61852			207.827	0.813587
																	105.854	0.79511							116.941	0.61852			207.787	0.813587
																	105.827	0.79511							116.915	0.61852			207.733	0.813587
																	105.827	0.79511							116.875	0.61852			207.72	0.813587
																	105.84	0.79511							116.849	0.61852			207.666	0.813587
																	105.84	0.79511							116.822	0.61852			207.639	0.813587
																	105.867	0.79511							116.795	0.61852			207.575	0.813587
																	105.84	0.79511							116.754	0.61852			207.547	0.813587
																	105.84	0.79511							116.729	0.61852			207.506	0.813587
																	105.84	0.79511							116.769	0.61852			207.481	0.813587
																	105.867	0.79511							117.542	0.61852			207.427	0.813587
																	105.88	0.79511							118.277	0.61852			207.388	0.813587
																	105.88	0.79511							118.903	0.61852			207.36	0.813587
																	105.867	0.79511							119.142	0.62498			207.335	0.813587
																	105.867	0.79511							119.022	0.629825			207.321	0.813587
																	105.894	0.79511							118.85	0.629825			207.335	0.813587
																	105.907	0.79511							118.756	0.629825			208.202	0.813587
																	105.867	0.79511							118.676	0.629825			209.03	0.813587
																	105.867	0.79511							118.596	0.629825			209.402	0.820057
																	105.854	0.79511							118.529	0.629825			209.31	0.820057
																	105.84	0.79511							118.448	0.634669			209.189	0.820057
																	105.84	0.79511							118.395	0.634669			209.083	0.820057
																	105.867	0.79511							118.329	0.634669			209.029	0.820057
																	105.88	0.79511							118.29	0.634669			208.963	0.820057
																	105.867	0.79511							118.236	0.634669			208.909	0.820057
																	105.854	0.79511							118.169	0.634669			208.855	0.820057
																	105.88	0.79511							118.142	0.634669			208.815	0.820057
																	105.88	0.79511							118.09	0.634669			209.255	0.820057
																	105.894	0.79511							118.049	0.634669			210.098	0.820057
																	105.88	0.79511							118.009	0.634669			210.79	0.820057
																	105.867	0.79511							117.983	0.634669			211.549	0.824909
																	105.854	0.79511							117.93	0.634669			211.578	0.829761
																	105.854	0.79511							117.89	0.634669			211.39	0.829761
																	105.867	0.79511							117.85	0.634669			211.27	0.829761
																	105.894	0.79511							117.811	0.634669			211.177	0.836231
																	105.88	0.79511							117.77	0.634669			211.083	0.836231
																	105.88	0.79511							117.731	0.634669			211.019	0.836231
																	105.88	0.79511							117.692	0.634669			210.951	0.836231
																	105.894	0.79511							117.639	0.634669			210.885	0.836231
																	105.894	0.79511							117.599	0.634669			210.83	0.836231
																	105.88	0.79511							117.572	0.634669			210.766	0.836231
																	105.88	0.79511							117.533	0.634669			210.697	0.836231
																	105.88	0.79511							117.48	0.634669			210.643	0.836231
																	105.88	0.79511							117.453	0.634669			210.603	0.836231
																	105.88	0.79511							117.425	0.634669			210.564	0.836231
																	105.88	0.79511							117.386	0.634669			210.51	0.836231
																	105.88	0.79511							117.333	0.634669			210.455	0.836231
																	105.88	0.79511							117.305	0.634669			210.401	0.836231
																	105.88	0.79511							117.265	0.634669			210.375	0.836231
																	105.88	0.79511							117.226	0.634669			210.321	0.836231
																	105.867	0.79511							117.2	0.634669			210.282	0.836231
																	105.867	0.79511							117.172	0.634669			210.24	0.836231
																	105.867	0.79511							117.145	0.634669			210.188	0.836231
																	105.867	0.79511							117.145	0.634669			210.148	0.836231
																	105.894	0.79511							117.159	0.634669			210.107	0.836231
																	105.88	0.79511							117.213	0.634669			210.068	0.836231
																	105.88	0.79511							117.292	0.634669			210.015	0.836231
																	105.894	0.79511							117.346	0.634669			209.986	0.836231
																	105.92	0.79511							117.402	0.641129			209.949	0.836231
																	105.947	0.79511							117.387	0.641129			209.921	0.836231
																	105.934	0.79511							117.347	0.641129			209.897	0.836231
																	105.92	0.79511							117.282	0.641129			209.91	0.836231
																	105.947	0.79511							117.242	0.641129			210.016	0.836231
																	105.96	0.79511							117.175	0.641129			210.11	0.836231
																	105.96	0.79511							117.148	0.645974			210.231	0.836231
																	105.947	0.79511							117.081	0.645974			210.351	0.836231
																	105.947	0.79511							117.056	0.645974			210.458	0.836231
																	105.947	0.79511							117.002	0.645974			210.552	0.836231
																	105.934	0.79511							116.962	0.645974			210.672	0.836231
																	105.947	0.79511							116.909	0.645974			210.792	0.836231
																	105.947	0.79511							116.868	0.645974			210.899	0.836231
																	105.934	0.79511							116.842	0.645974			211.007	0.836231
																	105.934	0.79511							116.829	0.645974			211.126	0.836231
																	105.934	0.79511							116.775	0.645974			211.247	0.836231
																	105.947	0.79511							116.736	0.645974			211.339	0.845936
																	105.96	0.79511							116.708	0.645974			211.326	0.845936
																	105.934	0.79511							116.669	0.645974			211.3	0.845936
																	105.92	0.79511							116.628	0.645974			211.232	0.845936
																	105.934	0.79511							116.602	0.645974			211.181	0.845936
																	105.947	0.79511							116.562	0.645974			211.112	0.845936
																	105.974	0.79511							116.521	0.645974			211.074	0.845936
																	105.974	0.79511							116.481	0.645974			211.034	0.845936
																	105.96	0.79511							116.456	0.645974			210.994	0.845936
																	105.934	0.79511							116.482	0.645974			210.953	0.845936
																	105.947	0.79511							116.52	0.645974			210.941	0.852406
																	105.96	0.79511							116.589	0.650819			210.952	0.852406
																	105.974	0.79511							116.589	0.650819			210.928	0.852406
																	105.974	0.79511							116.548	0.650819			210.914	0.852406
																	105.974	0.79511							116.521	0.650819			210.86	0.852406
																	105.987	0.79511							116.482	0.650819			210.846	0.852406
																	105.987	0.79511							116.43	0.650819			210.82	0.852406
																	105.987	0.79511							116.402	0.650819			210.767	0.852406
																	105.96	0.79511							116.349	0.650819			210.74	0.852406
																	105.96	0.79511							116.309	0.650819			210.701	0.852406
																	105.947	0.79511							116.283	0.650819			210.673	0.852406
																	105.96	0.79511							116.256	0.650819			210.646	0.852406
																	105.974	0.79511							116.216	0.650819			210.765	0.852406
																	105.96	0.79511							116.19	0.650819			210.939	0.852406
																	105.96	0.79511							116.282	0.650819			211.112	0.852406
																	105.947	0.79511							116.389	0.650819			211.286	0.852406
																	105.987	0.79511							116.497	0.650819			211.458	0.852406
																	106	0.79511							116.589	0.650819			211.633	0.852406
																	105.974	0.79511							116.682	0.650819			211.779	0.852406
																	105.974	0.79511							116.803	0.650819			211.939	0.852406
																	105.974	0.79511							116.91	0.650819			212.099	0.852406
																	105.974	0.79511							116.964	0.650819			212.26	0.852406
																	106	0.79511							117.084	0.650819			212.433	0.852406
																	105.987	0.79511							117.176	0.650819			212.606	0.852406
																	105.974	0.79511							117.258	0.650819			212.78	0.852406
																	105.96	0.79511							117.325	0.657279			212.967	0.852406
																	105.987	0.79511							117.285	0.657279			213.274	0.852406
																	106.014	0.79511							117.205	0.657279			213.514	0.852406
																	105.987	0.79511							117.15	0.657279			213.794	0.852406
																	105.974	0.79511							117.179	0.657279			214.062	0.857258
																	105.974	0.79511							117.258	0.662123			214.234	0.862111
																	105.974	0.79511							117.258	0.662123			214.221	0.862111
																	105.987	0.79511							117.218	0.662123			214.113	0.862111
																	105.974	0.79511							117.165	0.662123			214.02	0.862111
																	105.96	0.79511							117.085	0.662123			213.952	0.868581
																	105.974	0.79511							117.032	0.662123			213.886	0.868581
																	105.987	0.79511							116.979	0.662123			213.833	0.868581
																	106	0.79511							116.925	0.662123			213.767	0.868581
																	105.974	0.79511							116.871	0.662123			213.726	0.868581
																	105.96	0.79511							116.845	0.662123			213.688	0.868581
																	105.96	0.79511							116.793	0.662123			213.635	0.868581
																	105.987	0.79511							116.739	0.662123			213.608	0.868581
																	106	0.79511							116.698	0.662123			213.57	0.868581
																	105.987	0.79511							116.737	0.662123			213.542	0.868581
																	105.987	0.79511							116.926	0.666968			213.502	0.868581
																	105.987	0.79511							116.95	0.666968			213.476	0.868581
																	106	0.79511							116.924	0.666968			213.449	0.868581
																	106.027	0.79511							116.832	0.666968			213.557	0.868581
																	106.014	0.79511							116.779	0.666968			213.717	0.868581
																	106	0.79511							116.724	0.666968			213.891	0.868581
																	105.974	0.79511							116.684	0.666968			214.051	0.868581
																	105.974	0.79511							116.631	0.666968			214.211	0.868581
																	105.987	0.79511							116.592	0.666968			214.358	0.868581
																	105.974	0.79511							116.54	0.666968			214.504	0.868581
																	105.96	0.79511							116.5	0.666968			214.664	0.868581
																	105.947	0.79511							116.446	0.666968			214.811	0.868581
																	105.947	0.801561							116.405	0.666968			214.998	0.868581
																	105.96	0.801561							116.366	0.666968			215.144	0.868581
																	105.96	0.801561							116.487	0.666968			215.331	0.868581
																	105.947	0.801561							116.662	0.666968			215.545	0.873433
																	105.934	0.801561							116.861	0.666968			215.758	0.873433
																	105.947	0.801561							117.101	0.666968			215.972	0.873433
																	105.974	0.801561							117.303	0.666968			216.157	0.873433
																	105.987	0.801561							117.53	0.666968			216.358	0.873433
																	105.987	0.801561							117.717	0.673428			216.504	0.878285
																	105.974	0.801561							117.732	0.673428			216.438	0.878285
																	105.974	0.801561							117.624	0.673428			216.331	0.878285
																	105.987	0.801561							117.543	0.673428			216.224	0.878285
																	106.014	0.801561							117.464	0.673428			216.157	0.878285
																	106	0.801561							117.384	0.673428			216.091	0.878285
																	106	0.801561							117.303	0.678273			216.076	0.878285
																	106	0.801561							117.251	0.678273			216.331	0.878285
																	106	0.801561							117.17	0.678273			216.542	0.878285
																	106.014	0.801561							117.116	0.678273			216.742	0.884755
																	106.014	0.801561							117.064	0.678273			216.728	0.884755
																	106	0.801561							116.997	0.678273			216.649	0.884755
																	106	0.801561							116.943	0.678273			216.555	0.884755
																	106	0.801561							116.903	0.678273			216.488	0.884755
																	106	0.801561							116.837	0.678273			216.409	0.884755
																	106.014	0.801561							116.784	0.678273			216.342	0.884755
																	105.987	0.801561							116.744	0.678273			216.273	0.884755
																	105.987	0.801561							116.69	0.683117			216.248	0.884755
																	105.987	0.801561							116.636	0.683117			216.408	0.884755
																	105.987	0.801561							116.597	0.683117			216.808	0.884755
																	105.987	0.801561							116.557	0.683117			217.128	0.884755
																	105.974	0.801561							116.489	0.683117			217.448	0.884755
																	105.96	0.8064							116.437	0.683117			217.741	0.884755
																	105.974	0.8064							116.41	0.683117			218.008	0.884755
																	105.987	0.8064							116.356	0.683117			218.288	0.884755
																	106	0.8064							116.316	0.683117			218.581	0.884755
																	105.96	0.8064							116.276	0.683117			218.701	0.889608
																	105.96	0.8064							116.21	0.683117			218.583	0.89446
																	105.96	0.8064							116.17	0.683117			218.461	0.89446
																	105.974	0.8064							116.129	0.683117			218.368	0.89446
																	105.96	0.8064							116.104	0.683117			218.289	0.89446
																	105.947	0.8064							116.063	0.683117			218.222	0.89446
																	105.947	0.8064							116.037	0.683117			218.156	0.89446
																	105.96	0.8064							115.984	0.683117			218.088	0.89446
																	105.987	0.8064							115.945	0.683117			218.035	0.89446
																	106.014	0.8064							115.89	0.683117			217.995	0.89446
																	105.987	0.8064							115.864	0.683117			217.943	0.89446
																	105.934	0.8064							115.838	0.683117			217.889	0.89446
																	105.96	0.8064							116.117	0.683117			217.837	0.89446
																	105.974	0.8064							116.424	0.683117			217.783	0.89446
																	106.014	0.8064							116.624	0.683117			217.757	0.89446
																	105.934	0.8064							116.866	0.683117			218.01	0.89446
																	105.96	0.8064							117.092	0.683117			218.464	0.89446
																	105.987	0.8064							117.198	0.689577			218.838	0.90093
																	106.027	0.8064							117.118	0.689577			218.825	0.90093
																	106	0.8064							117.012	0.689577			218.732	0.90093
																	105.987	0.8064							116.92	0.694422			218.638	0.90093
																	105.974	0.8064							116.813	0.694422			218.557	0.90093
																	105.974	0.8064							116.746	0.694422			218.477	0.90093
																	106.014	0.8064							116.68	0.694422			218.424	0.90093
																	106	0.8064							116.611	0.694422			218.344	0.90093
																	105.974	0.8064							116.56	0.694422			218.317	0.90093
																	106	0.8064							116.52	0.694422			218.45	0.90093
																	105.987	0.8064							116.44	0.694422			218.931	0.90093
																	105.987	0.8064							116.386	0.694422			219.411	0.90093
																	106	0.8064							116.347	0.694422			219.904	0.90093
																	106	0.8064							116.267	0.694422			220.358	0.90093
																	105.987	0.8064							116.227	0.699267			220.797	0.90093
																	105.974	0.8064							116.172	0.699267			221.212	0.910635
																	105.974	0.8064							116.092	0.699267			221.278	0.910635
																	105.96	0.8064							116.052	0.699267			221.132	0.910635
																	105.987	0.8064							115.973	0.699267			220.972	0.910635
																	105.974	0.8064							115.948	0.699267			220.892	0.910635
																	105.96	0.8064							115.908	0.699267			220.772	0.910635
																	105.96	0.8064							115.841	0.699267			220.693	0.910635
																	105.987	0.8064							115.814	0.699267			220.627	0.910635
																	105.974	0.8064							115.733	0.699267			220.546	0.910635
																	105.974	0.8064							115.681	0.699267			220.48	0.910635
																	105.987	0.8064							115.64	0.699267			220.4	0.910635
																	105.987	0.8064							115.587	0.699267			220.332	0.917105
																	106	0.8064							115.546	0.699267			220.292	0.917105
																	105.987	0.8064							115.493	0.699267			220.225	0.910635
																	105.974	0.8064							115.44	0.699267			220.186	0.917105
																	105.974	0.8064							115.386	0.699267			220.132	0.917105
																	105.987	0.8064							115.334	0.699267			220.079	0.917105
																	106.014	0.8064							115.282	0.699267			220.054	0.917105
																	105.974	0.8064							115.255	0.699267			220.014	0.917105
																	105.947	0.8064							115.187	0.699267			219.987	0.917105
																	105.96	0.8064							115.149	0.699267			219.934	0.917105
																	106.014	0.8064							115.095	0.699267			219.88	0.917105
																	106.014	0.8064							115.041	0.699267			219.842	0.917105
[truncated: 4,450 more rows]
