# Supplementary material for: Rapid hydration and weakening of anhydrite under stress: implications for natural hydration in the Earth's crust and mantle
Source: Copernicus journal article supplement (doi:10.5194/se-14-985-2023), 2023-09-01
Supplement: Supplementary file 1 [file se-14-985-2023-supplement.zip]

Archive with 3 entries (3 files):
- se-14-985-2023-supplement-title-page.pdf
- Mechanical Data.xlsx
- Supplement_JH.pdf
