# Supplementary material for: Rapid hydration and weakening of anhydrite under stress: implications for natural hydration in the Earth's crust and mantle
Source: Copernicus journal article supplement (doi:10.5194/se-14-985-2023), 2023-09-01
Supplement: Supplementary file 1 [file se-14-985-2023-supplement.zip › se-14-985-2023-supplement-title-page.pdf]

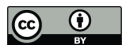

*Supplement of*

**Rapid hydration and weakening of anhydrite under stress: implications for natural hydration in the Earth's crust and mantle**

**Johanna Heeb et al.**

*Correspondence to:* Johanna Heeb (j.heeb@uu.nl)

- se-14-985-2023-supplement-title-page.pdf
- Mechanical Data.xlsx
- Supplement\_JH.pdf

The copyright of individual parts of the supplement might differ from the article licence.
